# Supplementary material for: Effects of varying group sizes on performance, body defects, and productivity in broiler chickens
Source: Copernicus journal article supplement (doi:10.5194/aab-65-171-2022), 2022-05-05
Supplement: Supplementary file 1 [file 6-weeks BW, FPD, BB.xlsx]

## Sheet: 6-weeks BW-FPD-HB-BB
BIRDNO	TREATMENT	GROUP	SEX	SEXCODE	INTERACTIONCODE	6WEEKBW	FPD	HOCKBURN	BREASTBURN
1	3000	1	D	1	1	2140	1	1	2
2	3000	1	D	1	1	2320	2	1	2
3	3000	1	D	1	1	1820	1	1	2
5	3000	1	D	1	1	1980	3	1	2
6	3000	1	D	1	1	2240	1	1	2
7	3000	1	D	1	1	2480	2	1	2
10	3000	1	D	1	1	2240	2	1	2
15	3000	1	D	1	1	1920	1	1	2
17	3000	1	D	1	1	2320	3	1	2
19	3000	1	D	1	1	2960	1	1	2
23	3000	1	D	1	1	2320	2	2	3
26	3000	1	D	1	1	2130	2	2	2
27	3000	1	D	1	1	2050	1	1	2
29	3000	1	D	1	1	2070	2	2	2
31	3000	1	D	1	1	2140	3	2	2
32	3000	1	D	1	1	2250	2	2	2
36	3000	1	D	1	1	2380	1	1	1
37	3000	1	D	1	1	2410	1	1	1
39	3000	1	D	1	1	2080	2	2	1
41	3000	1	D	1	1	2380	1	1	1
42	3000	1	D	1	1	2410	2	2	2
45	3000	1	D	1	1	2170	2	1	1
47	3000	1	D	1	1	2230	2	1	1
48	3000	1	D	1	1	2170	1	2	1
49	3000	1	D	1	1	2560	2	2	1
52	3000	1	D	1	1	2680	2	2	2
54	3000	1	D	1	1	2150	2	2	3
55	3000	1	D	1	1	2360	2	1	1
57	3000	1	D	1	1	1980	2	1	2
59	3000	1	D	1	1	2140	3	2	2
60	3000	1	D	1	1	2350	2	2	2
63	3000	1	D	1	1	2150	2	2	2
65	3000	1	D	1	1	2450	2	2	1
67	3000	1	D	1	1	2240	2	1	2
68	3000	1	D	1	1	2310	2	2	1
69	3000	1	D	1	1	2450	2	2	1
72	3000	1	D	1	1	2450	2	2	1
74	3000	1	D	1	1	2150	3	2	2
75	3000	1	D	1	1	2860	2	2	2
76	3000	2	D	1	1	2180	1	1	1
80	3000	2	D	1	1	2260	2	1	1
82	3000	2	D	1	1	2500	1	1	2
84	3000	2	D	1	1	2040	1	1	1
87	3000	2	D	1	1	2040	1	1	2
91	3000	2	D	1	1	2140	2	1	1
95	3000	2	D	1	1	2260	1	1	2
100	3000	2	D	1	1	2980	2	1	2
101	3000	2	D	1	1	2140	2	2	3
103	3000	2	D	1	1	2150	2	1	2
105	3000	2	D	1	1	2250	2	2	3
106	3000	2	D	1	1	2470	1	1	2
109	3000	2	D	1	1	2150	2	2	2
111	3000	2	D	1	1	2350	1	1	1
113	3000	2	D	1	1	2140	0	1	1
115	3000	2	D	1	1	2250	2	2	2
116	3000	2	D	1	1	2040	2	1	3
117	3000	2	D	1	1	2090	1	1	2
120	3000	2	D	1	1	2450	1	1	2
122	3000	2	D	1	1	2140	1	2	2
124	3000	2	D	1	1	2020	2	2	3
126	3000	2	D	1	1	2250	1	1	2
129	3000	2	D	1	1	2180	1	1	2
131	3000	2	D	1	1	2070	2	1	2
132	3000	2	D	1	1	1980	1	1	2
134	3000	2	D	1	1	2410	1	1	2
135	3000	2	D	1	1	2230	2	1	3
138	3000	2	D	1	1	2210	1	1	1
140	3000	2	D	1	1	2110	1	2	3
141	3000	2	D	1	1	2210	1	1	2
144	3000	2	D	1	1	2190	2	1	2
146	3000	2	D	1	1	2040	2	2	2
147	3000	2	D	1	1	2130	1	1	2
149	3000	2	D	1	1	2480	1	1	2
151	3000	3	D	1	1	2380	0	1	2
156	3000	3	D	1	1	2180	1	1	2
157	3000	3	D	1	1	2080	2	1	2
163	3000	3	D	1	1	2300	1	1	3
164	3000	3	D	1	1	2000	2	1	2
166	3000	3	D	1	1	2420	1	1	2
167	3000	3	D	1	1	2440	2	1	3
169	3000	3	D	1	1	2360	2	1	2
171	3000	3	D	1	1	2120	2	1	2
175	3000	3	D	1	1	1920	2	1	1
177	3000	3	D	1	1	2150	2	1	2
179	3000	3	D	1	1	2320	1	1	2
180	3000	3	D	1	1	2140	1	1	2
182	3000	3	D	1	1	2140	1	1	2
183	3000	3	D	1	1	2200	2	1	2
187	3000	3	D	1	1	2150	2	1	1
189	3000	3	D	1	1	2140	1	1	2
190	3000	3	D	1	1	2310	2	1	2
192	3000	3	D	1	1	2100	1	1	2
194	3000	3	D	1	1	2040	2	1	3
195	3000	3	D	1	1	1980	1	1	2
198	3000	3	D	1	1	2140	2	1	3
199	3000	3	D	1	1	2020	1	1	2
202	3000	3	D	1	1	2170	2	2	3
204	3000	3	D	1	1	2300	1	1	1
207	3000	3	D	1	1	2120	2	1	2
208	3000	3	D	1	1	2300	2	1	2
210	3000	3	D	1	1	2250	1	2	2
211	3000	3	D	1	1	2130	2	2	2
213	3000	3	D	1	1	2530	1	1	2
214	3000	3	D	1	1	2040	1	1	2
216	3000	3	D	1	1	1980	1	1	2
217	3000	3	D	1	1	2130	1	1	2
219	3000	3	D	1	1	2130	0	1	1
220	3000	3	D	1	1	2460	1	1	2
221	3000	3	D	1	1	2850	1	1	2
223	3000	3	D	1	1	2200	2	1	2
225	3000	3	D	1	1	2300	1	1	2
226	3000	3	D	1	1	2180	1	1	2
227	3000	3	D	1	1	2380	1	1	1
230	3000	4	D	1	1	2360	2	1	2
232	3000	4	D	1	1	2240	2	1	2
236	3000	4	D	1	1	2340	1	1	2
242	3000	4	D	1	1	2140	2	1	2
247	3000	4	D	1	1	2080	1	1	2
248	3000	4	D	1	1	2480	1	2	2
251	3000	4	D	1	1	2520	1	1	2
253	3000	4	D	1	1	2460	1	1	2
254	3000	4	D	1	1	2380	1	1	1
257	3000	4	D	1	1	2410	2	1	1
259	3000	4	D	1	1	2380	1	1	2
261	3000	4	D	1	1	2150	2	2	3
262	3000	4	D	1	1	2360	1	1	2
264	3000	4	D	1	1	2450	1	1	2
267	3000	4	D	1	1	2430	2	1	1
269	3000	4	D	1	1	2180	2	1	1
270	3000	4	D	1	1	2520	1	1	2
271	3000	4	D	1	1	2260	1	1	2
275	3000	4	D	1	1	2340	1	1	1
277	3000	4	D	1	1	2700	1	1	1
280	3000	4	D	1	1	2450	1	1	2
281	3000	4	D	1	1	2360	2	1	3
284	3000	4	D	1	1	2150	1	1	2
285	3000	4	D	1	1	2350	1	1	2
286	3000	4	D	1	1	2250	1	1	2
288	3000	4	D	1	1	2420	1	1	2
290	3000	4	D	1	1	2360	1	1	2
292	3000	4	D	1	1	2250	1	1	1
294	3000	4	D	1	1	2250	1	1	2
295	3000	4	D	1	1	2160	2	1	3
298	3000	4	D	1	1	2450	1	1	2
300	3000	4	D	1	1	2230	2	1	2
4	3000	1	E	2	2	2580	2	2	3
8	3000	1	E	2	2	2460	1	2	1
9	3000	1	E	2	2	2380	3	1	2
11	3000	1	E	2	2	2300	1	1	1
12	3000	1	E	2	2	2400	3	2	2
13	3000	1	E	2	2	2080	2	1	2
14	3000	1	E	2	2	2380	3	1	2
16	3000	1	E	2	2	2760	1	1	2
18	3000	1	E	2	2	2600	1	1	2
20	3000	1	E	2	2	2160	2	1	1
21	3000	1	E	2	2	1920	2	1	2
22	3000	1	E	2	2	2540	2	1	2
24	3000	1	E	2	2	2460	2	2	3
25	3000	1	E	2	2	2060	2	1	2
28	3000	1	E	2	2	1920	2	2	3
30	3000	1	E	2	2	2640	1	1	2
33	3000	1	E	2	2	2480	2	2	2
34	3000	1	E	2	2	2870	3	2	3
35	3000	1	E	2	2	2690	2	2	2
38	3000	1	E	2	2	2850	2	2	2
40	3000	1	E	2	2	2960	2	2	2
43	3000	1	E	2	2	2360	3	2	2
44	3000	1	E	2	2	2860	2	2	1
46	3000	1	E	2	2	2850	3	2	2
50	3000	1	E	2	2	2970	2	1	1
51	3000	1	E	2	2	2470	2	1	1
53	3000	1	E	2	2	2590	2	2	2
56	3000	1	E	2	2	2750	1	1	1
58	3000	1	E	2	2	2840	2	1	1
61	3000	1	E	2	2	2780	2	1	1
62	3000	1	E	2	2	2680	2	1	1
64	3000	1	E	2	2	2990	1	1	1
66	3000	1	E	2	2	2760	2	2	2
70	3000	1	E	2	2	2860	1	1	2
71	3000	1	E	2	2	2760	2	1	1
73	3000	1	E	2	2	2690	2	1	2
77	3000	2	E	2	2	2820	0	1	1
78	3000	2	E	2	2	2420	0	1	2
79	3000	2	E	2	2	2480	1	1	2
81	3000	2	E	2	2	2560	1	1	3
83	3000	2	E	2	2	2070	1	1	2
85	3000	2	E	2	2	2360	1	1	2
86	3000	2	E	2	2	2720	1	1	2
88	3000	2	E	2	2	2060	2	1	1
89	3000	2	E	2	2	2920	1	1	2
90	3000	2	E	2	2	2860	1	1	2
92	3000	2	E	2	2	2240	1	1	2
93	3000	2	E	2	2	2420	0	1	1
94	3000	2	E	2	2	2440	1	1	2
96	3000	2	E	2	2	2700	1	1	3
97	3000	2	E	2	2	2680	2	1	3
98	3000	2	E	2	2	1800	2	2	2
99	3000	2	E	2	2	2460	1	1	3
102	3000	2	E	2	2	2680	2	2	3
104	3000	2	E	2	2	2350	1	2	3
107	3000	2	E	2	2	2980	2	1	2
108	3000	2	E	2	2	2680	2	2	3
110	3000	2	E	2	2	2850	1	1	2
112	3000	2	E	2	2	2830	1	1	1
114	3000	2	E	2	2	2850	1	1	2
118	3000	2	E	2	2	2580	2	2	3
119	3000	2	E	2	2	2960	1	1	2
121	3000	2	E	2	2	2840	1	1	2
123	3000	2	E	2	2	2680	1	1	1
125	3000	2	E	2	2	2170	1	1	2
127	3000	2	E	2	2	2860	1	1	2
128	3000	2	E	2	2	2470	2	2	3
130	3000	2	E	2	2	2810	1	1	2
133	3000	2	E	2	2	2860	1	2	2
136	3000	2	E	2	2	2670	1	2	2
137	3000	2	E	2	2	2910	2	1	2
139	3000	2	E	2	2	2640	2	1	2
142	3000	2	E	2	2	2800	1	1	2
143	3000	2	E	2	2	2470	1	1	2
145	3000	2	E	2	2	2820	1	1	1
148	3000	2	E	2	2	2910	1	1	2
150	3000	2	E	2	2	2650	1	1	2
152	3000	3	E	2	2	2480	0	1	1
153	3000	3	E	2	2	2040	0	1	2
154	3000	3	E	2	2	2360	1	1	3
155	3000	3	E	2	2	2760	0	1	2
158	3000	3	E	2	2	3000	1	1	2
159	3000	3	E	2	2	2520	1	1	1
160	3000	3	E	2	2	2740	2	1	2
161	3000	3	E	2	2	2220	2	2	1
162	3000	3	E	2	2	2900	1	1	2
165	3000	3	E	2	2	2820	1	1	2
168	3000	3	E	2	2	2580	1	1	1
170	3000	3	E	2	2	2940	1	1	2
172	3000	3	E	2	2	2400	2	1	2
173	3000	3	E	2	2	2680	1	1	3
174	3000	3	E	2	2	3220	1	1	2
176	3000	3	E	2	2	2680	2	1	2
178	3000	3	E	2	2	2860	1	1	1
181	3000	3	E	2	2	2860	2	1	1
184	3000	3	E	2	2	2850	0	1	1
185	3000	3	E	2	2	2690	1	1	2
186	3000	3	E	2	2	2470	2	2	2
188	3000	3	E	2	2	2620	2	1	1
191	3000	3	E	2	2	2850	2	1	2
193	3000	3	E	2	2	2760	2	2	3
196	3000	3	E	2	2	2590	1	1	2
197	3000	3	E	2	2	2760	1	1	2
200	3000	3	E	2	2	2830	1	1	2
201	3000	3	E	2	2	2960	1	1	2
203	3000	3	E	2	2	2580	1	1	2
205	3000	3	E	2	2	2680	1	1	2
206	3000	3	E	2	2	2750	1	1	2
209	3000	3	E	2	2	2830	1	1	3
212	3000	3	E	2	2	2830	1	1	2
215	3000	3	E	2	2	2920	1	1	2
218	3000	3	E	2	2	2280	2	2	3
222	3000	3	E	2	2	2900	1	1	2
224	3000	3	E	2	2	2760	2	1	2
228	3000	3	E	2	2	2900	2	1	1
229	3000	4	E	2	2	2840	1	1	2
231	3000	4	E	2	2	2520	1	1	2
233	3000	4	E	2	2	2900	1	1	2
234	3000	4	E	2	2	3000	0	1	3
235	3000	4	E	2	2	2780	2	1	2
237	3000	4	E	2	2	2680	1	1	1
238	3000	4	E	2	2	2900	1	1	1
239	3000	4	E	2	2	2680	1	1	1
240	3000	4	E	2	2	2560	1	1	2
241	3000	4	E	2	2	3000	1	2	1
243	3000	4	E	2	2	2920	1	1	2
244	3000	4	E	2	2	2500	1	1	1
245	3000	4	E	2	2	2760	1	1	1
246	3000	4	E	2	2	2960	1	1	2
249	3000	4	E	2	2	2980	1	1	2
250	3000	4	E	2	2	2680	1	1	3
252	3000	4	E	2	2	2950	1	1	1
255	3000	4	E	2	2	2860	1	1	1
256	3000	4	E	2	2	2930	1	1	2
258	3000	4	E	2	2	2860	1	1	2
260	3000	4	E	2	2	2740	1	1	1
263	3000	4	E	2	2	2850	1	1	1
265	3000	4	E	2	2	2690	1	1	2
266	3000	4	E	2	2	2780	1	1	2
268	3000	4	E	2	2	2860	1	2	1
272	3000	4	E	2	2	2700	1	1	2
273	3000	4	E	2	2	2560	1	1	2
274	3000	4	E	2	2	2960	2	2	3
276	3000	4	E	2	2	2860	1	1	2
278	3000	4	E	2	2	2640	1	1	1
279	3000	4	E	2	2	2830	1	1	1
282	3000	4	E	2	2	2480	1	2	3
283	3000	4	E	2	2	2590	1	1	2
287	3000	4	E	2	2	2830	1	1	1
289	3000	4	E	2	2	2710	1	2	3
291	3000	4	E	2	2	2680	1	1	2
293	3000	4	E	2	2	2480	1	1	2
296	3000	4	E	2	2	2690	1	2	2
297	3000	4	E	2	2	2830	1	1	2
299	3000	4	E	2	2	2750	1	1	2
1	4000	1	D	1	3	2610	3	1	2
4	4000	1	D	1	3	2450	1	1	3
6	4000	1	D	1	3	2700	1	1	3
8	4000	1	D	1	3	2690	2	1	3
11	4000	1	D	1	3	2330	1	1	3
13	4000	1	D	1	3	2760	1	1	3
15	4000	1	D	1	3	2620	2	1	3
18	4000	1	D	1	3	2670	2	1	2
19	4000	1	D	1	3	2510	1	1	2
20	4000	1	D	1	3	2520	2	1	2
22	4000	1	D	1	3	2540	0	1	2
24	4000	1	D	1	3	2540	1	1	2
25	4000	1	D	1	3	2520	1	1	3
27	4000	1	D	1	3	2450	1	1	2
29	4000	1	D	1	3	2730	2	1	2
30	4000	1	D	1	3	2400	1	1	2
33	4000	1	D	1	3	2780	1	1	2
35	4000	1	D	1	3	2700	1	1	2
37	4000	1	D	1	3	2450	1	1	2
38	4000	1	D	1	3	2380	1	1	1
40	4000	1	D	1	3	2680	2	1	2
41	4000	1	D	1	3	2660	3	1	2
43	4000	1	D	1	3	2450	1	1	2
44	4000	1	D	1	3	2480	1	1	1
45	4000	1	D	1	3	2540	1	1	2
46	4000	1	D	1	3	2300	2	1	3
47	4000	1	D	1	3	1970	1	1	3
49	4000	1	D	1	3	2560	2	1	2
51	4000	1	D	1	3	2510	1	1	2
52	4000	1	D	1	3	2480	1	1	2
53	4000	1	D	1	3	2560	1	1	2
56	4000	1	D	1	3	2530	2	2	3
58	4000	1	D	1	3	2650	1	1	2
60	4000	1	D	1	3	2510	2	2	3
61	4000	1	D	1	3	2460	3	2	3
65	4000	1	D	1	3	2430	1	1	2
66	4000	1	D	1	3	2510	1	1	3
69	4000	1	D	1	3	2610	2	2	2
70	4000	1	D	1	3	2450	2	1	3
72	4000	1	D	1	3	2460	1	1	2
73	4000	1	D	1	3	2510	2	1	3
77	4000	1	D	1	3	2700	1	1	2
78	4000	1	D	1	3	2610	2	2	2
80	4000	1	D	1	3	2460	3	2	3
84	4000	1	D	1	3	2520	1	1	1
86	4000	1	D	1	3	2530	2	1	3
88	4000	1	D	1	3	2380	1	2	3
90	4000	1	D	1	3	2720	1	1	2
92	4000	1	D	1	3	2530	2	1	3
93	4000	1	D	1	3	2410	2	2	3
94	4000	1	D	1	3	2620	1	1	1
96	4000	1	D	1	3	2390	1	1	2
97	4000	1	D	1	3	2480	1	1	2
100	4000	1	D	1	3	2570	1	1	2
101	4000	2	D	1	3	2180	1	1	1
103	4000	2	D	1	3	2450	1	1	2
106	4000	2	D	1	3	2640	0	1	2
107	4000	2	D	1	3	2690	1	1	2
109	4000	2	D	1	3	2320	1	1	2
110	4000	2	D	1	3	2680	1	1	2
112	4000	2	D	1	3	2710	1	1	3
113	4000	2	D	1	3	2320	1	1	3
117	4000	2	D	1	3	3220	1	1	2
118	4000	2	D	1	3	2560	1	1	1
120	4000	2	D	1	3	2800	1	1	2
121	4000	2	D	1	3	2480	1	1	2
122	4000	2	D	1	3	2910	1	1	2
124	4000	2	D	1	3	3140	1	1	2
125	4000	2	D	1	3	2300	0	1	2
127	4000	2	D	1	3	2830	2	1	2
129	4000	2	D	1	3	2590	1	1	3
131	4000	2	D	1	3	2800	1	1	1
132	4000	2	D	1	3	2380	1	1	1
134	4000	2	D	1	3	2560	1	1	2
137	4000	2	D	1	3	2560	0	1	2
140	4000	2	D	1	3	2530	1	1	2
141	4000	2	D	1	3	2690	0	1	1
143	4000	2	D	1	3	2290	2	1	1
146	4000	2	D	1	3	2440	1	1	1
149	4000	2	D	1	3	2500	1	1	2
150	4000	2	D	1	3	2580	0	1	2
153	4000	2	D	1	3	2750	1	1	1
155	4000	2	D	1	3	2650	2	1	2
156	4000	2	D	1	3	2560	1	1	2
157	4000	2	D	1	3	2780	1	1	2
159	4000	2	D	1	3	2860	1	1	1
160	4000	2	D	1	3	2540	1	1	2
164	4000	2	D	1	3	2850	1	1	2
165	4000	2	D	1	3	2460	1	1	2
166	4000	2	D	1	3	2650	1	1	2
168	4000	2	D	1	3	2580	1	2	3
170	4000	2	D	1	3	2490	1	1	2
172	4000	2	D	1	3	2450	1	1	2
173	4000	2	D	1	3	2950	2	1	2
174	4000	2	D	1	3	2780	1	2	3
177	4000	2	D	1	3	2860	0	1	2
178	4000	2	D	1	3	2750	1	1	3
182	4000	2	D	1	3	2600	1	1	2
184	4000	2	D	1	3	2710	1	1	3
185	4000	2	D	1	3	2360	1	2	2
188	4000	2	D	1	3	2530	1	1	2
190	4000	2	D	1	3	3100	1	1	2
192	4000	2	D	1	3	2560	1	1	2
193	4000	2	D	1	3	2780	1	2	2
195	4000	2	D	1	3	2860	1	1	2
196	4000	2	D	1	3	2710	1	1	2
197	4000	2	D	1	3	2490	1	1	2
199	4000	2	D	1	3	2490	1	1	2
200	4000	2	D	1	3	2670	1	1	2
201	4000	3	D	1	3	2400	1	1	2
202	4000	3	D	1	3	2450	2	1	2
203	4000	3	D	1	3	2300	2	1	2
207	4000	3	D	1	3	2460	1	1	2
209	4000	3	D	1	3	2770	2	1	2
211	4000	3	D	1	3	2400	2	1	2
214	4000	3	D	1	3	2520	2	1	3
216	4000	3	D	1	3	2400	2	1	2
218	4000	3	D	1	3	2750	1	2	2
219	4000	3	D	1	3	2710	2	1	2
223	4000	3	D	1	3	2380	2	1	2
225	4000	3	D	1	3	2320	1	1	2
226	4000	3	D	1	3	2800	1	1	1
229	4000	3	D	1	3	2830	1	1	2
231	4000	3	D	1	3	2750	1	1	1
232	4000	3	D	1	3	2390	1	1	2
233	4000	3	D	1	3	2930	1	1	2
235	4000	3	D	1	3	2430	2	1	2
236	4000	3	D	1	3	2360	1	1	1
237	4000	3	D	1	3	2620	2	1	2
239	4000	3	D	1	3	2470	1	1	1
243	4000	3	D	1	3	2620	0	1	2
244	4000	3	D	1	3	2390	1	1	2
247	4000	3	D	1	3	2840	1	1	2
248	4000	3	D	1	3	2580	1	1	2
250	4000	3	D	1	3	2730	0	1	2
251	4000	3	D	1	3	2810	1	1	3
254	4000	3	D	1	3	2750	2	2	3
255	4000	3	D	1	3	2830	1	2	2
257	4000	3	D	1	3	2450	2	1	2
259	4000	3	D	1	3	2650	1	2	2
261	4000	3	D	1	3	2560	0	1	2
262	4000	3	D	1	3	2340	1	1	2
263	4000	3	D	1	3	2460	2	2	3
266	4000	3	D	1	3	2580	1	1	2
268	4000	3	D	1	3	2560	1	1	2
270	4000	3	D	1	3	2450	2	2	3
271	4000	3	D	1	3	2670	1	2	2
273	4000	3	D	1	3	2640	2	1	3
275	4000	3	D	1	3	2760	1	1	2
276	4000	3	D	1	3	2560	1	1	2
280	4000	3	D	1	3	2490	1	1	1
281	4000	3	D	1	3	2570	2	1	2
283	4000	3	D	1	3	2580	1	1	2
285	4000	3	D	1	3	2660	1	1	2
286	4000	3	D	1	3	2470	1	1	2
288	4000	3	D	1	3	2570	2	1	3
289	4000	3	D	1	3	2550	1	1	2
292	4000	3	D	1	3	2850	1	1	2
293	4000	3	D	1	3	2790	1	1	3
296	4000	3	D	1	3	2750	1	1	2
297	4000	3	D	1	3	2680	0	1	1
299	4000	3	D	1	3	2580	1	1	2
300	4000	3	D	1	3	2490	0	1	1
2	4000	1	E	2	4	3170	1	1	3
3	4000	1	E	2	4	3490	2	1	3
5	4000	1	E	2	4	3390	2	1	2
7	4000	1	E	2	4	3140	2	2	3
9	4000	1	E	2	4	2700	1	1	3
10	4000	1	E	2	4	3140	1	1	2
12	4000	1	E	2	4	2960	2	1	3
14	4000	1	E	2	4	2450	1	2	3
16	4000	1	E	2	4	1890	2	2	3
17	4000	1	E	2	4	2910	2	1	2
21	4000	1	E	2	4	2470	0	1	3
23	4000	1	E	2	4	1950	2	1	3
26	4000	1	E	2	4	2470	1	1	2
28	4000	1	E	2	4	3290	1	1	2
31	4000	1	E	2	4	3590	2	1	2
32	4000	1	E	2	4	2880	2	1	3
34	4000	1	E	2	4	2730	1	1	3
36	4000	1	E	2	4	2850	2	1	2
39	4000	1	E	2	4	2940	1	1	2
42	4000	1	E	2	4	3410	1	2	3
48	4000	1	E	2	4	2840	2	1	2
50	4000	1	E	2	4	3190	2	2	3
54	4000	1	E	2	4	2940	2	1	3
55	4000	1	E	2	4	3010	1	1	2
57	4000	1	E	2	4	2860	1	1	2
59	4000	1	E	2	4	2900	1	1	2
62	4000	1	E	2	4	2850	2	2	3
63	4000	1	E	2	4	3120	2	2	3
64	4000	1	E	2	4	2840	1	1	2
67	4000	1	E	2	4	2860	1	1	3
68	4000	1	E	2	4	2970	1	1	2
71	4000	1	E	2	4	2780	2	1	2
74	4000	1	E	2	4	2940	1	1	3
75	4000	1	E	2	4	3160	2	2	3
76	4000	1	E	2	4	3210	1	1	2
79	4000	1	E	2	4	2900	2	1	3
81	4000	1	E	2	4	2910	2	1	2
82	4000	1	E	2	4	3160	1	1	2
83	4000	1	E	2	4	2840	1	1	2
85	4000	1	E	2	4	3120	1	1	2
87	4000	1	E	2	4	2940	2	2	3
89	4000	1	E	2	4	2860	2	1	2
91	4000	1	E	2	4	2980	2	1	2
95	4000	1	E	2	4	2860	1	1	2
98	4000	1	E	2	4	2920	1	1	3
99	4000	1	E	2	4	3180	2	2	2
102	4000	2	E	2	4	3800	1	1	2
104	4000	2	E	2	4	3720	1	1	1
105	4000	2	E	2	4	3120	1	1	2
108	4000	2	E	2	4	3230	2	1	3
111	4000	2	E	2	4	3820	2	2	3
114	4000	2	E	2	4	3500	1	1	2
115	4000	2	E	2	4	3200	1	1	2
116	4000	2	E	2	4	3300	0	1	2
119	4000	2	E	2	4	3200	1	1	3
123	4000	2	E	2	4	3150	1	1	1
126	4000	2	E	2	4	2550	0	1	2
128	4000	2	E	2	4	3130	1	2	3
130	4000	2	E	2	4	3650	1	1	2
133	4000	2	E	2	4	2850	1	1	2
135	4000	2	E	2	4	3370	1	1	2
136	4000	2	E	2	4	3140	1	1	2
138	4000	2	E	2	4	3170	1	1	2
139	4000	2	E	2	4	2920	2	1	1
142	4000	2	E	2	4	2400	0	1	1
144	4000	2	E	2	4	3400	1	1	2
145	4000	2	E	2	4	3220	1	1	2
147	4000	2	E	2	4	2730	1	1	1
148	4000	2	E	2	4	2810	0	1	1
151	4000	2	E	2	4	2950	1	1	2
152	4000	2	E	2	4	3200	1	1	2
154	4000	2	E	2	4	3220	1	1	1
158	4000	2	E	2	4	3120	0	1	2
161	4000	2	E	2	4	2980	1	1	2
162	4000	2	E	2	4	3300	1	1	2
163	4000	2	E	2	4	3120	0	1	1
167	4000	2	E	2	4	3040	2	2	3
169	4000	2	E	2	4	3100	1	1	2
171	4000	2	E	2	4	2960	1	1	2
175	4000	2	E	2	4	3180	1	1	2
176	4000	2	E	2	4	2990	2	1	2
179	4000	2	E	2	4	2460	1	1	2
180	4000	2	E	2	4	2800	1	1	3
181	4000	2	E	2	4	2780	2	1	2
183	4000	2	E	2	4	3140	1	1	3
186	4000	2	E	2	4	2780	1	1	2
187	4000	2	E	2	4	2920	1	1	2
189	4000	2	E	2	4	2970	2	1	3
191	4000	2	E	2	4	3150	1	1	2
194	4000	2	E	2	4	3220	0	1	3
198	4000	2	E	2	4	3230	0	1	3
204	4000	3	E	2	4	3480	3	2	3
205	4000	3	E	2	4	3200	2	1	2
206	4000	3	E	2	4	3260	2	1	2
208	4000	3	E	2	4	2960	1	1	2
210	4000	3	E	2	4	2700	1	1	2
212	4000	3	E	2	4	3380	2	1	1
213	4000	3	E	2	4	3370	1	2	3
215	4000	3	E	2	4	2680	0	1	2
217	4000	3	E	2	4	3230	2	2	2
220	4000	3	E	2	4	3340	1	2	2
221	4000	3	E	2	4	2660	2	1	3
222	4000	3	E	2	4	3150	1	2	3
224	4000	3	E	2	4	3140	2	1	3
227	4000	3	E	2	4	3380	2	1	1
228	4000	3	E	2	4	2930	0	1	1
230	4000	3	E	2	4	3400	1	1	3
234	4000	3	E	2	4	3260	1	2	3
238	4000	3	E	2	4	3240	1	1	2
240	4000	3	E	2	4	2920	2	1	2
241	4000	3	E	2	4	2390	2	1	1
242	4000	3	E	2	4	3500	1	1	2
245	4000	3	E	2	4	2730	2	1	3
246	4000	3	E	2	4	3410	1	2	2
249	4000	3	E	2	4	3270	1	2	3
252	4000	3	E	2	4	3120	1	2	3
253	4000	3	E	2	4	3200	1	2	3
256	4000	3	E	2	4	2960	2	1	2
258	4000	3	E	2	4	3140	1	1	3
260	4000	3	E	2	4	2980	1	1	2
264	4000	3	E	2	4	3130	2	2	3
265	4000	3	E	2	4	3320	1	1	3
267	4000	3	E	2	4	2970	2	1	3
269	4000	3	E	2	4	3160	1	1	2
272	4000	3	E	2	4	2880	1	1	2
274	4000	3	E	2	4	3210	2	2	3
277	4000	3	E	2	4	3200	1	2	3
278	4000	3	E	2	4	3100	2	2	3
279	4000	3	E	2	4	2850	1	2	3
282	4000	3	E	2	4	2990	1	1	2
284	4000	3	E	2	4	3150	2	2	3
287	4000	3	E	2	4	3140	1	1	2
290	4000	3	E	2	4	3220	1	2	3
291	4000	3	E	2	4	3450	2	1	2
294	4000	3	E	2	4	2990	1	1	3
295	4000	3	E	2	4	3350	2	2	2
298	4000	3	E	2	4	3340	1	1	2
2	6000	1	D	1	5	1843	2	2	2
3	6000	1	D	1	5	2114	3	3	3
4	6000	1	D	1	5	2191	1	1	3
11	6000	1	D	1	5	2234	2	1	2
12	6000	1	D	1	5	2156	2	1	2
15	6000	1	D	1	5	2466	2	2	2
18	6000	1	D	1	5	2144	3	3	3
19	6000	1	D	1	5	1984	3	2	2
23	6000	1	D	1	5	2353	1	2	1
25	6000	1	D	1	5	2175	2	1	2
26	6000	1	D	1	5	2519	2	2	2
29	6000	1	D	1	5	2015	0	0	1
30	6000	1	D	1	5	2364	1	1	3
32	6000	1	D	1	5	2421	2	2	3
35	6000	1	D	1	5	2346	3	2	3
38	6000	1	D	1	5	2182	3	3	3
39	6000	1	D	1	5	1934	3	3	3
41	6000	1	D	1	5	2053	3	3	3
42	6000	1	D	1	5	2731	2	1	3
43	6000	1	D	1	5	1963	2	3	3
44	6000	1	D	1	5	2436	1	1	2
45	6000	1	D	1	5	2056	2	3	3
46	6000	1	D	1	5	2417	2	1	2
47	6000	1	D	1	5	2104	2	1	3
49	6000	1	D	1	5	2126	1	2	2
51	6000	1	D	1	5	2331	2	1	3
52	6000	1	D	1	5	2228	2	1	2
54	6000	1	D	1	5	2236	2	1	3
55	6000	1	D	1	5	2193	2	2	3
56	6000	1	D	1	5	1910	2	3	3
58	6000	1	D	1	5	2032	2	3	2
60	6000	1	D	1	5	2245	2	0	2
63	6000	1	D	1	5	2238	1	2	3
65	6000	1	D	1	5	2032	2	3	3
66	6000	1	D	1	5	2129	3	3	2
68	6000	1	D	1	5	2196	3	3	3
69	6000	1	D	1	5	2292	2	2	2
72	6000	1	D	1	5	1758	3	3	2
75	6000	1	D	1	5	2025	1	1	2
76	6000	1	D	1	5	2747	1	1	2
81	6000	1	D	1	5	1781	3	1	2
83	6000	1	D	1	5	2487	2	2	3
84	6000	1	D	1	5	1920	3	2	2
85	6000	1	D	1	5	2235	2	1	2
88	6000	1	D	1	5	2007	2	1	2
90	6000	1	D	1	5	2319	2	1	2
93	6000	1	D	1	5	2564	1	1	3
94	6000	1	D	1	5	2319	2	1	3
98	6000	1	D	1	5	1987	2	2	3
99	6000	1	D	1	5	2385	2	2	2
100	6000	1	D	1	5	2466	2	1	2
101	6000	1	D	1	5	2639	3	3	3
103	6000	1	D	1	5	2471	2	2	2
105	6000	1	D	1	5	2186	2	2	3
109	6000	1	D	1	5	2607	2	2	2
110	6000	1	D	1	5	2293	3	2	3
111	6000	1	D	1	5	2560	2	1	3
112	6000	1	D	1	5	2312	2	1	2
113	6000	1	D	1	5	2239	2	3	3
117	6000	1	D	1	5	2284	2	1	2
118	6000	1	D	1	5	2365	2	2	3
119	6000	1	D	1	5	3132	3	2	3
122	6000	1	D	1	5	2681	2	2	3
124	6000	1	D	1	5	2188	2	1	3
125	6000	1	D	1	5	2527	1	1	2
127	6000	1	D	1	5	2084	2	1	2
129	6000	1	D	1	5	2921	1	2	3
130	6000	1	D	1	5	2358	2	2	3
131	6000	1	D	1	5	2390	2	2	3
132	6000	1	D	1	5	2378	1	2	3
133	6000	1	D	1	5	2150	2	1	3
140	6000	1	D	1	5	2109	2	1	3
142	6000	1	D	1	5	2636	2	2	2
146	6000	1	D	1	5	2141	3	3	3
147	6000	1	D	1	5	2101	2	2	2
149	6000	1	D	1	5	2934	2	2	3
152	6000	2	D	1	5	2639	2	1	2
154	6000	2	D	1	5	2758	2	2	3
156	6000	2	D	1	5	2202	2	2	3
157	6000	2	D	1	5	2363	2	2	3
159	6000	2	D	1	5	2261	2	1	3
160	6000	2	D	1	5	1879	2	2	3
163	6000	2	D	1	5	2766	2	2	3
164	6000	2	D	1	5	2183	1	2	3
165	6000	2	D	1	5	2052	1	2	2
168	6000	2	D	1	5	2190	2	1	3
170	6000	2	D	1	5	2006	1	1	3
174	6000	2	D	1	5	2062	3	1	2
175	6000	2	D	1	5	2314	3	2	3
176	6000	2	D	1	5	2257	3	2	2
177	6000	2	D	1	5	2179	3	3	2
178	6000	2	D	1	5	2060	0	2	3
180	6000	2	D	1	5	2272	2	2	2
186	6000	2	D	1	5	1865	2	1	2
190	6000	2	D	1	5	2413	2	2	2
192	6000	2	D	1	5	2292	2	1	1
193	6000	2	D	1	5	2618	2	2	2
194	6000	2	D	1	5	2462	2	2	2
195	6000	2	D	1	5	2363	2	1	1
196	6000	2	D	1	5	2462	2	1	2
197	6000	2	D	1	5	2688	2	2	2
198	6000	2	D	1	5	2412	2	2	3
199	6000	2	D	1	5	2491	2	1	3
201	6000	2	D	1	5	2292	2	1	2
202	6000	2	D	1	5	2171	2	1	2
204	6000	2	D	1	5	2688	2	2	3
205	6000	2	D	1	5	2483	0	1	2
206	6000	2	D	1	5	2224	2	1	1
207	6000	2	D	1	5	2364	2	2	2
208	6000	2	D	1	5	2379	3	2	3
209	6000	2	D	1	5	2410	3	2	2
211	6000	2	D	1	5	2381	1	1	2
213	6000	2	D	1	5	2725	3	1	2
214	6000	2	D	1	5	2360	2	2	1
217	6000	2	D	1	5	2283	2	1	2
218	6000	2	D	1	5	2406	1	1	1
220	6000	2	D	1	5	2426	2	1	2
222	6000	2	D	1	5	2065	2	1	2
223	6000	2	D	1	5	2363	2	1	1
225	6000	2	D	1	5	2545	2	1	2
227	6000	2	D	1	5	2223	2	1	1
229	6000	2	D	1	5	2215	2	2	3
234	6000	2	D	1	5	2434	1	1	1
235	6000	2	D	1	5	2454	1	1	2
236	6000	2	D	1	5	2439	1	1	2
238	6000	2	D	1	5	2432	2	2	2
240	6000	2	D	1	5	2551	0	1	2
244	6000	2	D	1	5	2531	2	1	1
245	6000	2	D	1	5	2209	2	1	3
246	6000	2	D	1	5	2257	1	1	3
248	6000	2	D	1	5	2473	0	1	3
249	6000	2	D	1	5	2205	3	1	2
250	6000	2	D	1	5	2476	0	2	2
251	6000	2	D	1	5	2540	2	0	3
253	6000	2	D	1	5	2665	2	1	3
255	6000	2	D	1	5	2430	2	1	2
257	6000	2	D	1	5	2043	2	1	1
258	6000	2	D	1	5	2443	1	2	2
259	6000	2	D	1	5	2236	3	1	2
261	6000	2	D	1	5	2640	2	1	3
263	6000	2	D	1	5	2787	1	1	2
265	6000	2	D	1	5	2400	1	2	3
267	6000	2	D	1	5	2574	2	2	2
268	6000	2	D	1	5	2447	3	1	2
269	6000	2	D	1	5	2336	2	2	2
272	6000	2	D	1	5	2392	2	1	2
273	6000	2	D	1	5	2780	2	2	3
274	6000	2	D	1	5	2360	0	2	3
275	6000	2	D	1	5	2874	2	2	3
277	6000	2	D	1	5	2450	2	2	2
278	6000	2	D	1	5	2330	2	2	3
280	6000	2	D	1	5	2572	1	2	3
281	6000	2	D	1	5	2575	2	2	3
283	6000	2	D	1	5	2571	2	2	3
284	6000	2	D	1	5	2302	2	1	3
288	6000	2	D	1	5	2326	2	2	3
289	6000	2	D	1	5	2550	2	2	3
290	6000	2	D	1	5	2566	2	2	2
291	6000	2	D	1	5	2425	2	2	3
292	6000	2	D	1	5	2408	2	1	3
294	6000	2	D	1	5	2205	1	1	3
295	6000	2	D	1	5	2180	1	1	3
296	6000	2	D	1	5	2186	0	1	2
300	6000	2	D	1	5	2330	1	1	3
1	6000	1	E	2	6	2474	3	3	3
5	6000	1	E	2	6	2389	1	1	1
6	6000	1	E	2	6	2485	1	1	2
7	6000	1	E	2	6	3270	0	2	2
8	6000	1	E	2	6	3631	0	1	2
9	6000	1	E	2	6	2891	2	1	2
10	6000	1	E	2	6	2836	2	2	2
13	6000	1	E	2	6	2514	2	1	1
14	6000	1	E	2	6	2486	3	1	2
16	6000	1	E	2	6	2439	2	2	2
17	6000	1	E	2	6	1988	3	2	2
20	6000	1	E	2	6	3119	2	2	3
21	6000	1	E	2	6	2474	3	3	2
22	6000	1	E	2	6	2249	3	2	2
24	6000	1	E	2	6	2526	3	3	1
27	6000	1	E	2	6	2444	3	1	2
28	6000	1	E	2	6	2750	1	1	1
31	6000	1	E	2	6	2922	3	2	3
33	6000	1	E	2	6	3340	3	2	3
34	6000	1	E	2	6	2626	1	1	3
36	6000	1	E	2	6	2642	2	1	2
37	6000	1	E	2	6	2467	1	3	2
40	6000	1	E	2	6	2883	2	3	3
48	6000	1	E	2	6	2739	1	1	2
50	6000	1	E	2	6	3135	0	1	3
53	6000	1	E	2	6	1977	2	2	2
57	6000	1	E	2	6	2752	2	3	2
59	6000	1	E	2	6	2654	1	1	2
61	6000	1	E	2	6	3159	2	1	2
62	6000	1	E	2	6	3292	1	2	2
64	6000	1	E	2	6	2476	3	2	3
67	6000	1	E	2	6	2190	1	2	3
70	6000	1	E	2	6	3099	1	2	3
71	6000	1	E	2	6	2275	2	2	2
73	6000	1	E	2	6	2284	3	3	3
74	6000	1	E	2	6	3170	2	2	2
77	6000	1	E	2	6	3054	2	2	2
78	6000	1	E	2	6	2759	1	1	3
79	6000	1	E	2	6	3190	2	2	2
80	6000	1	E	2	6	2754	1	1	3
82	6000	1	E	2	6	3088	2	1	3
86	6000	1	E	2	6	2878	1	1	3
87	6000	1	E	2	6	3145	3	1	2
89	6000	1	E	2	6	2537	2	1	2
91	6000	1	E	2	6	2843	2	1	3
92	6000	1	E	2	6	3448	1	2	3
95	6000	1	E	2	6	2942	2	1	3
96	6000	1	E	2	6	2718	3	1	2
97	6000	1	E	2	6	2869	1	2	3
102	6000	1	E	2	6	2789	2	2	2
104	6000	1	E	2	6	2707	1	2	2
106	6000	1	E	2	6	2945	2	2	3
107	6000	1	E	2	6	2856	3	2	3
108	6000	1	E	2	6	2510	2	2	2
114	6000	1	E	2	6	2919	2	2	3
115	6000	1	E	2	6	3021	1	2	3
116	6000	1	E	2	6	2767	2	1	3
120	6000	1	E	2	6	3024	2	1	3
121	6000	1	E	2	6	2936	2	2	2
123	6000	1	E	2	6	3022	2	1	3
126	6000	1	E	2	6	2557	3	1	2
128	6000	1	E	2	6	2791	2	1	2
134	6000	1	E	2	6	2831	3	1	3
135	6000	1	E	2	6	2784	2	1	3
136	6000	1	E	2	6	3064	2	3	3
137	6000	1	E	2	6	2916	1	1	3
138	6000	1	E	2	6	2838	2	2	3
139	6000	1	E	2	6	3169	2	2	3
141	6000	1	E	2	6	3057	2	1	3
143	6000	1	E	2	6	2719	3	1	2
144	6000	1	E	2	6	3032	2	2	3
145	6000	1	E	2	6	2912	2	1	3
148	6000	1	E	2	6	2812	2	1	1
150	6000	1	E	2	6	3036	1	2	3
151	6000	2	E	2	6	2436	2	1	2
153	6000	2	E	2	6	2877	2	2	3
155	6000	2	E	2	6	2738	2	1	3
158	6000	2	E	2	6	3182	1	2	3
161	6000	2	E	2	6	2719	2	1	3
162	6000	2	E	2	6	2825	3	2	3
166	6000	2	E	2	6	3085	3	2	3
167	6000	2	E	2	6	2859	1	2	2
169	6000	2	E	2	6	3120	1	1	3
171	6000	2	E	2	6	3244	1	2	2
172	6000	2	E	2	6	2965	3	2	3
173	6000	2	E	2	6	2853	2	1	2
179	6000	2	E	2	6	3415	1	1	3
181	6000	2	E	2	6	2712	1	1	2
182	6000	2	E	2	6	3393	1	1	2
183	6000	2	E	2	6	2876	0	1	2
184	6000	2	E	2	6	3193	1	1	3
185	6000	2	E	2	6	2889	2	1	2
187	6000	2	E	2	6	2857	2	2	3
188	6000	2	E	2	6	3455	1	1	3
189	6000	2	E	2	6	2013	2	1	2
191	6000	2	E	2	6	2805	2	2	3
200	6000	2	E	2	6	2642	3	2	3
203	6000	2	E	2	6	2932	1	1	2
210	6000	2	E	2	6	3192	2	2	2
212	6000	2	E	2	6	2402	1	1	2
215	6000	2	E	2	6	2750	2	2	3
216	6000	2	E	2	6	3157	1	1	1
219	6000	2	E	2	6	3012	3	2	3
221	6000	2	E	2	6	2943	3	2	3
224	6000	2	E	2	6	3049	0	1	2
226	6000	2	E	2	6	2298	1	1	1
228	6000	2	E	2	6	2889	2	1	2
230	6000	2	E	2	6	2817	2	1	2
231	6000	2	E	2	6	2560	3	3	2
232	6000	2	E	2	6	2972	2	1	2
233	6000	2	E	2	6	2397	2	1	2
237	6000	2	E	2	6	2980	2	2	3
239	6000	2	E	2	6	3167	2	1	2
241	6000	2	E	2	6	2901	2	1	2
242	6000	2	E	2	6	2517	2	1	3
243	6000	2	E	2	6	3392	2	1	2
247	6000	2	E	2	6	3217	3	1	3
252	6000	2	E	2	6	2941	2	1	2
254	6000	2	E	2	6	2743	1	2	3
256	6000	2	E	2	6	2713	2	1	2
260	6000	2	E	2	6	3013	1	2	3
262	6000	2	E	2	6	3232	2	2	2
264	6000	2	E	2	6	2860	3	2	3
266	6000	2	E	2	6	3344	2	1	2
270	6000	2	E	2	6	3472	0	2	3
271	6000	2	E	2	6	3287	3	2	3
276	6000	2	E	2	6	3151	1	1	3
279	6000	2	E	2	6	3018	2	2	3
282	6000	2	E	2	6	3080	2	2	3
285	6000	2	E	2	6	3370	1	2	3
286	6000	2	E	2	6	2808	2	2	3
287	6000	2	E	2	6	3003	1	3	3
293	6000	2	E	2	6	3403	0	1	3
297	6000	2	E	2	6	2120	1	2	2
298	6000	2	E	2	6	3221	1	1	3
299	6000	2	E	2	6	3094	1	1	2
1	20000	3	D	1	7	2478	3	2	3
3	20000	KONTROL	D	1	7	2460	2	3	3
4	20000	3	D	1	7	2515	3	1	2
4	20000	KONTROL	D	1	7	2640	2	2	3
5	20000	3	D	1	7	2480	2	2	2
5	20000	KONTROL	D	1	7	2450	2	1	3
5	20000	KONTROL	D	1	7	2540	2	1	2
6	20000	KONTROL	D	1	7	2990	3	3	3
7	20000	KONTROL	D	1	7	2340	1	1	2
8	20000	3	D	1	7	2380	2	2	2
9	20000	KONTROL	D	1	7	2470	1	1	2
10	20000	KONTROL	D	1	7	2520	1	2	2
11	20000	3	D	1	7	2050	1	1	2
11	20000	KONTROL	D	1	7	2550	1	1	3
12	20000	3	D	1	7	1940	3	2	2
13	20000	3	D	1	7	2230	2	2	3
13	20000	KONTROL	D	1	7	2480	2	1	3
13	20000	KONTROL	D	1	7	1920	2	1	2
14	20000	KONTROL	D	1	7	2360	2	1	2
15	20000	KONTROL	D	1	7	2370	1	1	3
15	20000	KONTROL	D	1	7	2880	1	2	2
17	20000	3	D	1	7	2420	2	2	3
17	20000	KONTROL	D	1	7	2510	1	1	2
17	20000	KONTROL	D	1	7	2200	3	1	2
18	20000	3	D	1	7	2081	2	2	3
18	20000	KONTROL	D	1	7	2380	1	1	2
19	20000	3	D	1	7	2160	3	2	3
19	20000	KONTROL	D	1	7	2750	1	2	3
20	20000	KONTROL	D	1	7	2320	2	2	3
21	20000	KONTROL	D	1	7	2340	2	1	2
22	20000	KONTROL	D	1	7	2640	2	1	3
23	20000	3	D	1	7	1895	2	1	3
24	20000	3	D	1	7	1910	2	1	2
24	20000	KONTROL	D	1	7	2630	2	1	3
26	20000	3	D	1	7	2750	2	2	2
26	20000	KONTROL	D	1	7	2320	3	2	3
27	20000	KONTROL	D	1	7	2350	2	3	3
28	20000	3	D	1	7	2424	2	2	3
29	20000	KONTROL	D	1	7	2530	0	1	2
30	20000	3	D	1	7	2218	2	2	2
31	20000	3	D	1	7	2092	2	2	3
32	20000	3	D	1	7	2383	2	2	2
32	20000	KONTROL	D	1	7	2100	1	2	2
33	20000	3	D	1	7	2410	2	1	2
33	20000	KONTROL	D	1	7	2480	2	1	2
34	20000	KONTROL	D	1	7	2480	2	1	1
34	20000	KONTROL	D	1	7	2360	2	2	2
35	20000	3	D	1	7	2260	2	1	3
35	20000	KONTROL	D	1	7	2200	1	1	3
36	20000	3	D	1	7	1987	3	2	3
37	20000	3	D	1	7	2180	2	2	2
37	20000	KONTROL	D	1	7	2600	1	1	2
39	20000	KONTROL	D	1	7	2410	1	1	2
39	20000	KONTROL	D	1	7	2600	3	1	2
40	20000	3	D	1	7	2518	3	2	2
40	20000	KONTROL	D	1	7	2260	3	2	2
41	20000	KONTROL	D	1	7	2120	1	1	2
42	20000	3	D	1	7	2350	3	2	3
42	20000	KONTROL	D	1	7	2780	0	1	2
42	20000	KONTROL	D	1	7	2360	3	2	3
43	20000	KONTROL	D	1	7	2380	1	0	1
43	20000	KONTROL	D	1	7	2280	2	2	2
44	20000	3	D	1	7	2024	3	2	2
44	20000	KONTROL	D	1	7	2460	1	1	2
45	20000	KONTROL	D	1	7	2820	2	2	2
46	20000	3	D	1	7	2610	2	1	2
46	20000	KONTROL	D	1	7	1900	1	1	1
46	20000	KONTROL	D	1	7	2360	2	1	2
47	20000	KONTROL	D	1	7	2390	1	1	2
47	20000	KONTROL	D	1	7	1860	3	1	2
48	20000	3	D	1	7	2219	2	2	3
48	20000	KONTROL	D	1	7	2350	0	1	2
48	20000	KONTROL	D	1	7	1860	1	1	1
50	20000	3	D	1	7	2392	2	2	3
50	20000	KONTROL	D	1	7	2150	1	1	2
52	20000	KONTROL	D	1	7	2620	2	1	2
53	20000	KONTROL	D	1	7	2140	2	1	3
54	20000	KONTROL	D	1	7	2780	2	2	3
55	20000	KONTROL	D	1	7	2380	2	1	2
57	20000	KONTROL	D	1	7	2490	0	1	3
58	20000	KONTROL	D	1	7	2620	0	1	2
58	20000	KONTROL	D	1	7	2100	1	1	2
59	20000	3	D	1	7	2332	2	0	3
59	20000	KONTROL	D	1	7	2490	1	1	2
60	20000	KONTROL	D	1	7	2480	2	2	3
61	20000	3	D	1	7	2724	2	1	3
61	20000	KONTROL	D	1	7	2450	1	1	2
62	20000	KONTROL	D	1	7	2380	1	1	2
62	20000	KONTROL	D	1	7	2270	1	1	2
63	20000	3	D	1	7	2510	2	2	2
64	20000	KONTROL	D	1	7	2560	2	2	3
65	20000	KONTROL	D	1	7	2560	2	1	2
66	20000	3	D	1	7	2100	2	2	2
66	20000	KONTROL	D	1	7	2150	2	2	3
67	20000	3	D	1	7	2370	2	1	3
67	20000	KONTROL	D	1	7	2470	1	1	2
68	20000	3	D	1	7	2240	1	2	2
68	20000	KONTROL	D	1	7	2410	2	2	3
69	20000	3	D	1	7	2820	2	1	3
69	20000	KONTROL	D	1	7	2580	1	1	2
69	20000	KONTROL	D	1	7	2230	1	1	2
70	20000	3	D	1	7	2370	2	1	2
70	20000	KONTROL	D	1	7	2460	2	2	2
71	20000	3	D	1	7	2402	2	2	2
71	20000	KONTROL	D	1	7	2410	1	1	2
71	20000	KONTROL	D	1	7	2560	2	1	2
72	20000	3	D	1	7	2390	2	1	3
73	20000	3	D	1	7	2010	1	2	2
73	20000	KONTROL	D	1	7	2360	3	1	3
74	20000	KONTROL	D	1	7	2240	2	1	2
75	20000	KONTROL	D	1	7	2780	1	1	2
76	20000	KONTROL	D	1	7	2450	0	1	3
76	20000	KONTROL	D	1	7	2280	2	1	3
78	20000	3	D	1	7	2460	2	1	2
78	20000	KONTROL	D	1	7	2480	1	2	2
78	20000	KONTROL	D	1	7	1980	2	1	2
80	20000	3	D	1	7	2310	1	2	3
80	20000	KONTROL	D	1	7	2770	2	3	2
80	20000	KONTROL	D	1	7	2480	1	1	2
82	20000	KONTROL	D	1	7	2410	1	1	2
83	20000	3	D	1	7	2365	2	1	3
83	20000	KONTROL	D	1	7	2390	1	1	2
83	20000	KONTROL	D	1	7	1970	1	2	2
84	20000	3	D	1	7	2592	2	2	3
84	20000	KONTROL	D	1	7	2580	1	1	2
85	20000	3	D	1	7	2027	2	1	2
85	20000	KONTROL	D	1	7	1860	3	2	3
86	20000	3	D	1	7	2160	1	2	2
86	20000	KONTROL	D	1	7	2250	3	2	2
87	20000	KONTROL	D	1	7	2540	1	1	3
88	20000	KONTROL	D	1	7	2560	1	1	3
89	20000	3	D	1	7	2291	2	2	3
89	20000	KONTROL	D	1	7	2580	1	2	3
90	20000	KONTROL	D	1	7	2240	2	1	2
91	20000	KONTROL	D	1	7	2450	1	1	2
92	20000	KONTROL	D	1	7	2250	2	1	2
93	20000	3	D	1	7	2125	2	1	3
93	20000	KONTROL	D	1	7	2650	0	2	3
94	20000	3	D	1	7	2584	2	2	2
94	20000	KONTROL	D	1	7	2410	1	1	2
94	20000	KONTROL	D	1	7	2180	3	2	2
95	20000	3	D	1	7	2025	2	1	2
95	20000	KONTROL	D	1	7	2250	2	1	3
96	20000	KONTROL	D	1	7	2310	1	2	2
97	20000	3	D	1	7	2210	2	2	2
97	20000	KONTROL	D	1	7	1980	2	2	3
98	20000	KONTROL	D	1	7	2640	2	1	2
98	20000	KONTROL	D	1	7	2040	2	1	2
99	20000	3	D	1	7	2410	1	1	3
99	20000	KONTROL	D	1	7	2140	3	1	2
100	20000	KONTROL	D	1	7	2250	1	1	2
100	20000	KONTROL	D	1	7	2100	1	2	2
101	20000	3	D	1	7	2762	2	1	3
102	20000	KONTROL	D	1	7	2080	1	2	2
103	20000	KONTROL	D	1	7	2470	1	1	2
104	20000	3	D	1	7	2019	3	1	2
104	20000	KONTROL	D	1	7	1980	2	2	2
105	20000	KONTROL	D	1	7	2560	1	1	2
105	20000	KONTROL	D	1	7	2240	1	1	3
106	20000	3	D	1	7	2410	2	1	2
106	20000	KONTROL	D	1	7	2460	1	1	2
106	20000	KONTROL	D	1	7	2160	2	2	2
108	20000	3	D	1	7	2068	3	1	2
108	20000	KONTROL	D	1	7	2470	1	1	2
109	20000	KONTROL	D	1	7	2490	2	2	2
109	20000	KONTROL	D	1	7	2140	2	2	3
110	20000	KONTROL	D	1	7	2060	3	2	2
111	20000	KONTROL	D	1	7	2370	2	2	2
111	20000	KONTROL	D	1	7	2200	2	2	2
112	20000	3	D	1	7	2529	2	1	2
112	20000	KONTROL	D	1	7	2350	1	2	3
113	20000	3	D	1	7	2400	2	2	2
113	20000	KONTROL	D	1	7	2410	1	1	2
113	20000	KONTROL	D	1	7	1990	2	2	3
114	20000	3	D	1	7	2322	2	2	3
115	20000	3	D	1	7	2349	3	1	2
115	20000	KONTROL	D	1	7	2600	2	2	3
116	20000	KONTROL	D	1	7	2640	1	1	2
117	20000	KONTROL	D	1	7	2430	1	1	3
117	20000	KONTROL	D	1	7	2140	2	2	2
118	20000	KONTROL	D	1	7	2350	1	1	2
118	20000	KONTROL	D	1	7	2360	1	1	3
119	20000	3	D	1	7	2522	2	1	2
119	20000	KONTROL	D	1	7	2250	2	2	2
121	20000	3	D	1	7	2490	1	2	2
121	20000	KONTROL	D	1	7	2560	1	1	2
122	20000	3	D	1	7	2570	1	0	3
123	20000	3	D	1	7	2712	1	2	2
123	20000	KONTROL	D	1	7	2450	2	3	3
123	20000	KONTROL	D	1	7	1980	2	1	2
124	20000	KONTROL	D	1	7	2240	1	2	2
125	20000	3	D	1	7	2460	1	2	2
125	20000	KONTROL	D	1	7	2470	1	1	2
126	20000	KONTROL	D	1	7	2530	1	1	2
126	20000	KONTROL	D	1	7	2140	3	2	2
127	20000	3	D	1	7	2458	1	2	3
127	20000	KONTROL	D	1	7	2230	2	1	2
129	20000	3	D	1	7	2516	1	1	2
129	20000	KONTROL	D	1	7	2470	2	2	3
130	20000	3	D	1	7	2440	1	2	2
130	20000	KONTROL	D	1	7	2350	1	1	2
130	20000	KONTROL	D	1	7	2160	2	1	3
131	20000	3	D	1	7	2305	1	2	2
131	20000	KONTROL	D	1	7	2600	3	2	2
132	20000	KONTROL	D	1	7	2400	1	1	2
133	20000	3	D	1	7	2079	2	1	3
133	20000	KONTROL	D	1	7	2510	1	2	3
133	20000	KONTROL	D	1	7	1890	1	1	2
134	20000	3	D	1	7	2250	2	2	2
135	20000	3	D	1	7	2480	2	1	3
135	20000	KONTROL	D	1	7	2420	2	1	2
135	20000	KONTROL	D	1	7	2180	2	2	3
136	20000	3	D	1	7	2545	2	1	2
137	20000	KONTROL	D	1	7	2400	1	1	1
137	20000	KONTROL	D	1	7	1990	3	2	2
138	20000	KONTROL	D	1	7	2610	1	1	2
139	20000	KONTROL	D	1	7	2250	1	2	3
140	20000	3	D	1	7	2368	2	1	2
140	20000	KONTROL	D	1	7	2180	1	1	2
141	20000	3	D	1	7	2397	1	2	2
141	20000	KONTROL	D	1	7	2500	1	1	2
141	20000	KONTROL	D	1	7	2050	1	2	3
142	20000	KONTROL	D	1	7	2430	1	1	1
143	20000	KONTROL	D	1	7	2450	2	2	1
143	20000	KONTROL	D	1	7	1980	1	1	2
144	20000	KONTROL	D	1	7	2250	2	1	2
145	20000	3	D	1	7	2140	2	1	2
145	20000	KONTROL	D	1	7	2060	1	2	2
146	20000	3	D	1	7	2298	1	1	2
146	20000	KONTROL	D	1	7	2430	1	1	1
146	20000	KONTROL	D	1	7	2170	2	1	2
148	20000	3	D	1	7	2351	2	1	2
148	20000	KONTROL	D	1	7	2450	2	1	2
148	20000	KONTROL	D	1	7	1980	2	1	2
150	20000	KONTROL	D	1	7	2480	1	1	1
150	20000	KONTROL	D	1	7	2040	2	1	2
1	20000	KONTROL	E	2	8	3100	1	3	2
1	20000	KONTROL	E	2	8	3260	2	2	2
2	20000	3	E	2	8	2970	2	2	2
2	20000	KONTROL	E	2	8	3340	1	2	2
2	20000	KONTROL	E	2	8	2700	2	1	2
3	20000	3	E	2	8	2750	3	3	3
3	20000	KONTROL	E	2	8	2860	3	2	3
4	20000	KONTROL	E	2	8	2800	2	2	2
6	20000	3	E	2	8	2510	2	2	2
6	20000	KONTROL	E	2	8	2600	3	3	3
7	20000	3	E	2	8	2690	2	2	3
7	20000	KONTROL	E	2	8	2500	3	3	3
8	20000	KONTROL	E	2	8	2670	3	3	3
8	20000	KONTROL	E	2	8	2920	2	2	2
9	20000	3	E	2	8	2460	1	3	3
9	20000	KONTROL	E	2	8	2840	2	2	3
10	20000	3	E	2	8	2860	2	2	3
10	20000	KONTROL	E	2	8	3440	1	2	3
11	20000	KONTROL	E	2	8	3300	2	2	2
12	20000	KONTROL	E	2	8	3200	1	1	2
12	20000	KONTROL	E	2	8	2600	3	2	2
14	20000	3	E	2	8	2480	2	2	2
14	20000	KONTROL	E	2	8	3450	1	2	2
15	20000	3	E	2	8	2560	2	2	3
16	20000	3	E	2	8	2662	2	2	2
16	20000	KONTROL	E	2	8	3100	3	3	3
16	20000	KONTROL	E	2	8	2320	2	1	2
18	20000	KONTROL	E	2	8	2860	2	2	3
19	20000	KONTROL	E	2	8	3100	3	2	3
20	20000	3	E	2	8	2820	2	1	2
20	20000	KONTROL	E	2	8	2220	2	2	3
21	20000	3	E	2	8	2881	2	2	3
21	20000	KONTROL	E	2	8	3110	2	2	3
22	20000	3	E	2	8	2910	2	2	3
22	20000	KONTROL	E	2	8	3160	2	2	3
23	20000	KONTROL	E	2	8	3330	2	2	2
23	20000	KONTROL	E	2	8	2920	2	2	2
24	20000	KONTROL	E	2	8	2880	1	2	2
25	20000	3	E	2	8	2817	1	2	2
25	20000	KONTROL	E	2	8	3230	2	3	3
25	20000	KONTROL	E	2	8	2440	1	2	2
26	20000	KONTROL	E	2	8	3100	2	2	1
27	20000	3	E	2	8	2351	2	3	3
27	20000	KONTROL	E	2	8	3060	3	1	2
28	20000	KONTROL	E	2	8	3170	1	1	3
28	20000	KONTROL	E	2	8	2700	1	1	2
29	20000	3	E	2	8	2729	2	3	3
29	20000	KONTROL	E	2	8	2680	2	1	2
30	20000	KONTROL	E	2	8	2820	2	2	3
30	20000	KONTROL	E	2	8	2740	2	1	2
31	20000	KONTROL	E	2	8	3480	2	1	2
31	20000	KONTROL	E	2	8	2540	2	1	3
32	20000	KONTROL	E	2	8	2460	2	1	3
33	20000	KONTROL	E	2	8	3400	2	1	2
34	20000	3	E	2	8	1906	3	2	2
35	20000	KONTROL	E	2	8	3400	0	1	2
36	20000	KONTROL	E	2	8	3190	2	1	3
36	20000	KONTROL	E	2	8	3100	1	1	2
37	20000	KONTROL	E	2	8	2300	3	2	2
38	20000	3	E	2	8	2725	1	2	2
38	20000	KONTROL	E	2	8	2920	2	1	2
38	20000	KONTROL	E	2	8	2540	1	1	2
39	20000	3	E	2	8	2680	1	2	2
40	20000	KONTROL	E	2	8	2900	1	1	2
41	20000	3	E	2	8	2480	2	1	3
41	20000	KONTROL	E	2	8	3340	1	1	3
43	20000	3	E	2	8	2054	3	2	3
44	20000	KONTROL	E	2	8	3220	1	1	2
45	20000	3	E	2	8	2650	2	2	3
45	20000	KONTROL	E	2	8	2720	1	1	2
47	20000	3	E	2	8	1915	1	1	2
49	20000	3	E	2	8	2514	2	2	3
49	20000	KONTROL	E	2	8	3200	1	1	2
49	20000	KONTROL	E	2	8	2680	1	1	2
50	20000	KONTROL	E	2	8	3800	1	1	2
51	20000	3	E	2	8	2350	1	2	2
51	20000	KONTROL	E	2	8	3180	2	1	1
51	20000	KONTROL	E	2	8	2820	1	1	2
52	20000	3	E	2	8	2210	2	1	2
52	20000	KONTROL	E	2	8	2640	2	1	2
53	20000	3	E	2	8	3091	0	1	2
53	20000	KONTROL	E	2	8	2700	2	1	2
54	20000	3	E	2	8	2670	2	1	3
54	20000	KONTROL	E	2	8	2250	2	2	3
55	20000	3	E	2	8	2580	2	1	3
55	20000	KONTROL	E	2	8	2350	0	1	2
56	20000	3	E	2	8	2060	2	2	3
56	20000	KONTROL	E	2	8	3700	1	1	2
56	20000	KONTROL	E	2	8	2460	1	2	2
57	20000	3	E	2	8	2550	0	1	2
57	20000	KONTROL	E	2	8	2530	1	1	2
58	20000	3	E	2	8	2552	1	1	3
59	20000	KONTROL	E	2	8	2580	3	2	3
60	20000	3	E	2	8	2796	2	1	3
60	20000	KONTROL	E	2	8	2500	1	1	2
61	20000	KONTROL	E	2	8	2680	2	2	2
62	20000	3	E	2	8	2628	1	2	3
63	20000	KONTROL	E	2	8	2950	2	2	3
63	20000	KONTROL	E	2	8	2830	3	2	3
64	20000	3	E	2	8	2670	1	2	3
64	20000	KONTROL	E	2	8	2860	1	1	2
65	20000	3	E	2	8	2759	2	2	2
65	20000	KONTROL	E	2	8	2480	1	1	2
66	20000	KONTROL	E	2	8	2870	1	1	3
67	20000	KONTROL	E	2	8	2360	2	1	2
68	20000	KONTROL	E	2	8	2940	1	1	2
70	20000	KONTROL	E	2	8	2180	2	1	2
72	20000	KONTROL	E	2	8	3140	1	1	3
72	20000	KONTROL	E	2	8	2580	1	2	2
73	20000	KONTROL	E	2	8	3250	3	3	3
74	20000	3	E	2	8	2857	3	1	3
74	20000	KONTROL	E	2	8	2950	1	2	2
75	20000	3	E	2	8	2970	1	2	2
75	20000	KONTROL	E	2	8	2860	2	2	2
76	20000	3	E	2	8	2860	2	1	2
77	20000	3	E	2	8	2945	2	1	2
77	20000	KONTROL	E	2	8	3120	1	1	3
77	20000	KONTROL	E	2	8	2480	1	2	2
79	20000	3	E	2	8	2460	2	2	3
79	20000	KONTROL	E	2	8	3400	1	2	2
79	20000	KONTROL	E	2	8	2650	3	2	2
81	20000	3	E	2	8	3100	1	2	2
81	20000	KONTROL	E	2	8	2860	0	1	3
81	20000	KONTROL	E	2	8	2600	2	2	3
82	20000	3	E	2	8	2440	0	1	3
82	20000	KONTROL	E	2	8	2580	2	1	2
84	20000	KONTROL	E	2	8	2450	1	1	2
85	20000	KONTROL	E	2	8	2690	2	2	2
86	20000	KONTROL	E	2	8	3130	1	1	2
87	20000	3	E	2	8	2664	2	1	3
87	20000	KONTROL	E	2	8	2680	2	1	2
88	20000	3	E	2	8	2504	2	2	2
88	20000	KONTROL	E	2	8	2480	2	1	3
89	20000	KONTROL	E	2	8	3120	2	2	2
90	20000	3	E	2	8	2516	1	1	3
90	20000	KONTROL	E	2	8	3100	1	1	2
91	20000	3	E	2	8	3145	2	2	3
91	20000	KONTROL	E	2	8	2750	1	1	3
92	20000	3	E	2	8	2874	2	1	3
92	20000	KONTROL	E	2	8	2980	2	1	2
93	20000	KONTROL	E	2	8	2680	3	2	2
95	20000	KONTROL	E	2	8	2970	1	1	2
96	20000	3	E	2	8	3270	1	1	3
96	20000	KONTROL	E	2	8	2680	1	1	2
97	20000	KONTROL	E	2	8	2580	2	1	3
98	20000	3	E	2	8	2718	2	1	3
99	20000	KONTROL	E	2	8	2500	2	1	2
100	20000	3	E	2	8	2082	2	2	2
101	20000	KONTROL	E	2	8	3100	2	2	2
101	20000	KONTROL	E	2	8	2680	2	1	2
102	20000	3	E	2	8	3050	1	2	2
102	20000	KONTROL	E	2	8	3210	1	1	3
103	20000	3	E	2	8	2840	2	2	3
103	20000	KONTROL	E	2	8	2860	3	2	3
104	20000	KONTROL	E	2	8	2940	2	1	2
105	20000	3	E	2	8	2450	1	1	2
107	20000	3	E	2	8	2566	1	2	2
107	20000	KONTROL	E	2	8	2860	1	1	3
107	20000	KONTROL	E	2	8	2750	1	1	2
108	20000	KONTROL	E	2	8	2600	2	2	2
109	20000	3	E	2	8	2874	2	1	2
110	20000	3	E	2	8	2710	2	1	2
110	20000	KONTROL	E	2	8	2950	1	1	2
111	20000	3	E	2	8	2870	2	1	2
112	20000	KONTROL	E	2	8	2840	1	1	2
114	20000	KONTROL	E	2	8	2980	2	2	2
114	20000	KONTROL	E	2	8	2480	2	1	2
115	20000	KONTROL	E	2	8	3100	1	1	2
116	20000	3	E	2	8	2909	2	1	2
116	20000	KONTROL	E	2	8	2870	3	2	2
117	20000	3	E	2	8	2770	2	1	2
118	20000	3	E	2	8	2702	2	1	3
119	20000	KONTROL	E	2	8	2970	2	3	2
120	20000	3	E	2	8	2422	1	1	3
120	20000	KONTROL	E	2	8	3140	1	1	2
120	20000	KONTROL	E	2	8	2700	1	2	3
121	20000	KONTROL	E	2	8	2150	2	1	3
122	20000	KONTROL	E	2	8	3150	1	1	1
122	20000	KONTROL	E	2	8	2360	2	2	2
124	20000	3	E	2	8	2949	1	1	2
124	20000	KONTROL	E	2	8	2980	2	1	2
125	20000	KONTROL	E	2	8	2680	2	2	3
126	20000	3	E	2	8	2206	2	1	3
127	20000	KONTROL	E	2	8	3200	1	2	3
128	20000	3	E	2	8	2512	2	1	3
128	20000	KONTROL	E	2	8	3140	1	1	1
128	20000	KONTROL	E	2	8	2980	2	1	3
129	20000	KONTROL	E	2	8	2480	1	1	2
131	20000	KONTROL	E	2	8	3240	2	1	3
132	20000	3	E	2	8	2554	0	2	3
132	20000	KONTROL	E	2	8	2750	2	2	3
134	20000	KONTROL	E	2	8	3100	1	1	2
134	20000	KONTROL	E	2	8	2690	2	1	2
136	20000	KONTROL	E	2	8	3210	1	2	3
136	20000	KONTROL	E	2	8	2580	1	1	2
137	20000	3	E	2	8	3070	1	1	2
138	20000	3	E	2	8	2810	1	1	2
138	20000	KONTROL	E	2	8	2680	2	1	2
139	20000	3	E	2	8	3346	2	1	2
139	20000	KONTROL	E	2	8	3100	2	2	3
140	20000	KONTROL	E	2	8	2890	1	1	2
142	20000	3	E	2	8	2920	1	1	2
142	20000	KONTROL	E	2	8	2850	2	1	2
143	20000	3	E	2	8	2870	2	2	2
144	20000	3	E	2	8	2772	2	1	2
144	20000	KONTROL	E	2	8	2960	1	1	2
145	20000	KONTROL	E	2	8	2860	2	1	2
147	20000	3	E	2	8	3367	2	2	3
147	20000	KONTROL	E	2	8	3160	1	2	1
147	20000	KONTROL	E	2	8	2350	1	2	2
149	20000	3	E	2	8	2392	1	1	2
149	20000	KONTROL	E	2	8	2950	1	1	2
149	20000	KONTROL	E	2	8	2980	1	2	2
150	20000	3	E	2	8	2076	2	1	3
