# Supplementary material for: Effects of varying group sizes on performance, body defects, and productivity in broiler chickens
Source: Copernicus journal article supplement (doi:10.5194/aab-65-171-2022), 2022-05-05
Supplement: Supplementary file 1 [file aab-65-171-2022-supplement.zip]

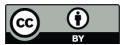

## *Supplement of*

# **Effects of varying group sizes on performance, body defects, and productivity in broiler chickens**

**Musa Sarıca et al.**

*Correspondence to:* Kadir Erensoy ([kadir.erensoy@omu.edu.tr](mailto:kadir.erensoy@omu.edu.tr))

- [aab-65-171-2022-supplement-title-page.pdf](#)
- Original data
  - 6-weeks BW, FPD, BB.xlsx
  - Altlık kalitesi.xlsx
  - CA.xlsx
  - EPEF.xlsx
  - Sıcaklık nem hh.xlsx

The copyright of individual parts of the supplement might differ from the article licence.
