# Supplementary material for: Effects of varying group sizes on performance, body defects, and productivity in broiler chickens
Source: Copernicus journal article supplement (doi:10.5194/aab-65-171-2022), 2022-05-05
Supplement: Supplementary file 2 [file Altlìk kalitesi.xlsx]

## Sheet: Sayfa1
GROUPSIZE	TREATMENT	REPLICATES	LITTERMOIST
6000	2	1	52.3087
6000	2	2	52.3125
6000	2	1	37.5
6000	2	2	37.5392
6000	2	1	34.9427
6000	2	2	36.1805
6000	2	1	39.5472
6000	2	2	39.2363
6000	2	1	36.6438
6000	2	2	33.3028
6000	2	1	31.5278
6000	2	2	26.7261
20000	1	1	43.0973
20000	1	2	37.6613
20000	1	1	34.1784
20000	1	2	35.7367
20000	1	1	25.2187
20000	1	2	27.1226
4000	2	1	43.3071
4000	2	2	41.185
4000	2	3	38.2979
4000	2	1	25.1758
4000	2	2	30.7285
4000	2	3	23.2215
4000	2	1	22.2222
4000	2	2	25.3659
4000	2	3	25.7979
20000	1	1	29.3177
20000	1	2	30.6147
20000	1	3	34.4444
20000	1	1	36.0784
20000	1	2	36.193
20000	1	3	33.9947
20000	1	1	38.3621
20000	1	2	38.2824
20000	1	3	39.3124
3000	2	1	57.9612
3000	2	2	46.0432
3000	2	3	50.0463
3000	2	1	27.8626
3000	2	2	26.5564
3000	2	3	29.8453
3000	2	1	33.9411
3000	2	2	30.8625
3000	2	3	32.254
3000	2	1	25.2941
3000	2	2	25.2155
3000	2	3	24.3376
20000	1	1	56.8449
20000	1	2	73.0994
20000	1	3	72.792
20000	1	1	24.2533
20000	1	2	26.1202
20000	1	3	23.954
20000	1	1	25.958
20000	1	2	25.0814
20000	1	3	27.0883
