# Supplementary material for: Effects of varying group sizes on performance, body defects, and productivity in broiler chickens
Source: Copernicus journal article supplement (doi:10.5194/aab-65-171-2022), 2022-05-05
Supplement: Supplementary file 3 [file CA.xlsx]

## Sheet: Sayfa1
TRIALNO	BIRDNO	TREATMENT	GROUP	SLAUGHTERAGE	CHICKWEIGHT	W1	W2	W3	W4	W5	W6
1	1	6000	1	39	42	225	532	1090	1800	2280	2474
1	2	6000	1	39	44	215	541	1250	1500	1920	1843
1	3	6000	1	39	41	195	529	1280	1760	2180	2114
1	4	6000	1	39	45	171	456	1040	1290	2085	2191
1	5	6000	1	39	43	189	544	1040	1460	2060	2389
1	6	6000	1	39	44	191	524	1260	1370	2060	2485
1	7	6000	1	39	48	188	352	1045	1580	2330	3270
1	8	6000	1	39	44	259	543	930	1620	2070	3631
1	9	6000	1	39	40	207	320	800	1660	2300	2891
1	10	6000	1	39	38	179	577	1195	1580	1610	2836
1	11	6000	1	39	41	215	609	880	1390	1940	2234
1	12	6000	1	39	44	239	581	1210	1220	1560	2156
1	13	6000	1	39	39	260	524	1135	1580	2410	2514
1	14	6000	1	39	50	199	583	1215	1680	1790	2486
1	15	6000	1	39	48	228	422	1080	1260	1970	2466
1	16	6000	1	39	44	239	639	1265	1380	1965	2439
1	17	6000	1	39	41	171	561	865	1360	2170	1988
1	18	6000	1	39	43	165	499	1000	1600	2085	2144
1	19	6000	1	39	42	162	502	1050	1360	2130	1984
1	20	6000	1	39	44	142	410	850	1480	1945	3119
1	21	6000	1	39	42	175	344	1165	1380	2085	2474
1	22	6000	1	39	41	204	550	930	1710	1760	2249
1	23	6000	1	39	40	185	540	1150	1075	2535	2353
1	24	6000	1	39	41	236	570	1125	1420	2025	2526
1	25	6000	1	39	40	136	470	840	1160	1960	2175
1	26	6000	1	39	39	217	590	1180	1825	1860	2519
1	27	6000	1	39	41	185	580	865	1440	1910	2444
1	28	6000	1	39	43	176	607	755	1600	2325	2750
1	29	6000	1	39	44	195	520	885	1185	2050	2015
1	30	6000	1	39	38	204	410	1210	1430	2640	2364
1	31	6000	1	39	41	158	520	1020	1960	1920	2922
1	32	6000	1	39	44	176	540	1175	1320	1680	2421
1	33	6000	1	39	40	169	560	1045	1460	2555	3340
1	34	6000	1	39	41	183	540	1135	1215	1725	2626
1	35	6000	1	39	42	190	550	960	1460	1690	2346
1	36	6000	1	39	45	179	340	1090	1490	2340	2642
1	37	6000	1	39	39	207	440	1100	1520	2765	2467
1	38	6000	1	39	40	214	600	975	1420	1710	2182
1	39	6000	1	39	45	195	420	1020	1700	1885	1934
1	40	6000	1	39	41	172	550	1105	1590	1645	2883
1	41	6000	1	39	43	168	520	1125	1560	1730	2053
1	42	6000	1	39	40	157	601	895	1410	2390	2731
1	43	6000	1	39	42	195	512	1150	1640	2495	1963
1	44	6000	1	39	41	184	362	1080	1880	1660	2436
1	45	6000	1	39	44	153	530	1000	1490	2000	2056
1	46	6000	1	39	38	178	571	865	1390	1785	2417
1	47	6000	1	39	42	209	510	905	1590	1800	2104
1	48	6000	1	39	45	196	552	1080	1680	2280	2739
1	49	6000	1	39	40	185	613	565	1520	1865	2126
1	50	6000	1	39	41	164	542	720	1880	2090	3135
1	51	6000	1	39	42	159	491	1060	1500	2720	2331
1	52	6000	1	39	41	204	543	810	1295	1590	2228
1	53	6000	1	39	43	199	565	880	1790	1915	1977
1	54	6000	1	39	45	182	462	1005	1510	1835	2236
1	55	6000	1	39	40	193	568	1025	1220	1865	2193
1	56	6000	1	39	41	204	563	775	1560	2840	1910
1	57	6000	1	39	43	211	545	1145	1845	2070	2752
1	58	6000	1	39	45	163	501	995	1850	1700	2032
1	59	6000	1	39	39	149	581	1225	1255	1890	2654
1	60	6000	1	39	40	191	583	895	1130	2250	2245
1	61	6000	1	39	41	171	502	1020	1340	2320	3159
1	62	6000	1	39	44	158	523	625	1540	1560	3292
1	63	6000	1	39	45	169	610	830	1590	2040	2238
1	64	6000	1	39	42	186	503	830	1460	2150	2476
1	65	6000	1	39	37	201	542	725	1440	2630	2032
1	66	6000	1	39	44	185	540	1050	1495	2290	2129
1	67	6000	1	39	38	204	520	870	1830	1730	2190
1	68	6000	1	39	42	211	470	1080	1620	2250	2196
1	69	6000	1	39	40	235	491	1120	1850	1715	2292
1	70	6000	1	39	39	159	532	1255	1690	2040	3099
1	71	6000	1	39	41	142	335	1070	1890	1860	2275
1	72	6000	1	39	44	197	530	1140	1580	1940	1758
1	73	6000	1	39	45	253	550	1090	1120	1790	2284
1	74	6000	1	39	41	243	530	1045	1360	2120	3170
1	75	6000	1	39	40	157	540	1230	1480	2825	2025
1	76	6000	1	39	45	164	541	1195	920	2510	2747
1	77	6000	1	39	40	183	440	1030	1320	2345	3054
1	78	6000	1	39	41	169	651	1140	1185	1780	2759
1	79	6000	1	39	42	179	612	990	1840	2110	3190
1	80	6000	1	39	43	185	540	1050	1890	2170	2754
1	81	6000	1	39	41	151	543	1065	1820	1845	1781
1	82	6000	1	39	44	167	480	1085	1720	2830	3088
1	83	6000	1	39	45	191	540	1180	1580	1230	2487
1	84	6000	1	39	44	164	512	945	1310	2100	1920
1	85	6000	1	39	44	201	645	1140	1230	1910	2235
1	86	6000	1	39	42	215	540	1190	1390	1725	2878
1	87	6000	1	39	40	179	608	925	1720	1965	3145
1	88	6000	1	39	41	193	533	980	1590	2380	2007
1	89	6000	1	39	40	184	543	965	1370	2130	2537
1	90	6000	1	39	40	229	544	805	1350	1980	2319
1	91	6000	1	39	41	241	538	1015	1400	2115	2843
1	92	6000	1	39	46	195	370	885	1630	1800	3448
1	93	6000	1	39	42	174	490	1080	1580	2445	2564
1	94	6000	1	39	43	168	640	1020	1690	1935	2319
1	95	6000	1	39	41	165	446	820	1660	1895	2942
1	96	6000	1	39	42	195	616	1065	1780	2250	2718
1	97	6000	1	39	42	178	529	795	1680	1775	2869
1	98	6000	1	39	44	192	545	1095	1440	1855	1987
1	99	6000	1	39	45	185	581	860	1530	2160	2385
1	100	6000	1	39	41	158	650	1185	1390	1925	2466
1	101	6000	1	39	40	167	645	840	1380	1950	2639
1	102	6000	1	39	41	239	670	1300	1480	1590	2789
1	103	6000	1	39	44	162	612	1020	900	1960	2471
1	104	6000	1	39	43	194	536	980	1860	2820	2707
1	105	6000	1	39	46	171	535	1290	1670	1985	2186
1	106	6000	1	39	40	209	560	1180	1420	1810	2945
1	107	6000	1	39	41	217	570	1120	1880	2000	2856
1	108	6000	1	39	44	184	510	945	1610	1980	2510
1	109	6000	1	39	45	168	442	1110	1660	1845	2607
1	110	6000	1	39	38	149	347	1005	1290	2665	2293
1	111	6000	1	39	37	154	510	985	1400	1785	2560
1	112	6000	1	39	45	178	420	1240	1445	1900	2312
1	113	6000	1	39	39	164	482	1275	1780	1800	2239
1	114	6000	1	39	41	158	515	1065	1680	1870	2919
1	115	6000	1	39	40	204	342	870	1660	2210	3021
1	116	6000	1	39	38	158	602	1150	1420	2135	2767
1	117	6000	1	39	40	166	600	1125	1780	1780	2284
1	118	6000	1	39	45	148	665	1075	1650	2830	2365
1	119	6000	1	39	41	177	645	1060	1980	2180	3132
1	120	6000	1	39	42	195	600	1050	1560	1515	3024
1	121	6000	1	39	41	174	677	1450	1780	2010	2936
1	122	6000	1	39	44	168	595	960	960	1910	2681
1	123	6000	1	39	45	158	465	1225	1440	1685	3022
1	124	6000	1	39	46	195	605	1120	1460	1545	2188
1	125	6000	1	39	40	211	505	985	1630	1985	2527
1	126	6000	1	39	41	198	615	885	1660	2070	2557
1	127	6000	1	39	42	177	570	975	1580	2340	2084
1	128	6000	1	39	41	211	574	990	1490	2215	2791
1	129	6000	1	39	43	152	385	950	1480	1940	2921
1	130	6000	1	39	41	167	580	780	1400	2235	2358
1	131	6000	1	39	45	204	550	840	1680	2130	2390
1	132	6000	1	39	44	195	695	850	1580	2190	2378
1	133	6000	1	39	40	211	555	1135	1355	2450	2150
1	134	6000	1	39	41	185	555	850	1095	1810	2831
1	135	6000	1	39	42	176	540	1125	1660	2085	2784
1	136	6000	1	39	42	167	465	835	1480	2090	3064
1	137	6000	1	39	42	202	520	935	1380	2580	2916
1	138	6000	1	39	41	185	510	975	1160	2290	2838
1	139	6000	1	39	43	173	490	1185	1280	2080	3169
1	140	6000	1	39	40	169	605	1020	1440	1940	2109
1	141	6000	1	39	41	185	390	1165	1280	2025	3057
1	142	6000	1	39	44	201	510	1070	1580	2090	2636
1	143	6000	1	39	46	207	500	990	1740	2170	2719
1	144	6000	1	39	42	158	552	890	1430	1865	3032
1	145	6000	1	39	41	149	492	1185	1450	2500	2912
1	146	6000	1	39	44	169	470	1050	1460	2150	2141
1	147	6000	1	39	40	163	523	1000	1660	1950	2101
1	148	6000	1	39	39	194	531	1060	1420	2100	2812
1	149	6000	1	39	40	185	610	1135	1580	2165	2934
1	150	6000	1	39	38	164	540	765	1490	1875	3036
1	151	6000	2	39	42	195	501	915	1250	1930	2436
1	152	6000	2	39	41	189	510	955	1360	1920	2639
1	153	6000	2	39	40	204	548	1180	1365	2090	2877
1	154	6000	2	39	44	177	580	1050	1580	2070	2758
1	155	6000	2	39	43	179	412	855	1860	2020	2738
1	156	6000	2	39	45	201	436	925	1730	2090	2202
1	157	6000	2	39	41	191	480	1080	1960	2050	2363
1	158	6000	2	39	40	169	640	1105	1310	2290	3182
1	159	6000	2	39	38	172	570	790	1595	1610	2261
1	160	6000	2	39	37	149	490	1135	1525	1950	1879
1	161	6000	2	39	42	183	527	1230	1550	1570	2719
1	162	6000	2	39	39	195	530	980	1680	2350	2825
1	163	6000	2	39	40	202	550	1300	1480	1800	2766
1	164	6000	2	39	39	182	610	840	1400	1950	2183
1	165	6000	2	39	41	169	617	880	1280	1965	2052
1	166	6000	2	39	47	174	580	1110	1400	2170	3085
1	167	6000	2	39	38	185	510	1275	1820	2085	2859
1	168	6000	2	39	40	165	543	1165	1880	2140	2190
1	169	6000	2	39	35	144	520	945	1740	1950	3120
1	170	6000	2	39	41	195	660	1230	1380	2095	2006
1	171	6000	2	39	46	213	520	870	1360	1790	3244
1	172	6000	2	39	42	203	601	1065	1380	2600	2965
1	173	6000	2	39	48	159	540	600	1360	2050	2853
1	174	6000	2	39	40	204	520	1025	1380	1980	2062
1	175	6000	2	39	41	194	544	835	1780	1820	2314
1	176	6000	2	39	42	157	704	770	1500	1900	2257
1	177	6000	2	39	43	168	532	1215	1380	2350	2179
1	178	6000	2	39	41	148	600	1125	1180	2010	2060
1	179	6000	2	39	37	195	420	1090	1390	1750	3415
1	180	6000	2	39	41	167	650	930	1320	2115	2272
1	181	6000	2	39	43	186	520	875	1580	2150	2712
1	182	6000	2	39	40	184	491	905	1560	1850	3393
1	183	6000	2	39	4	176	640	1065	1340	2750	2876
1	184	6000	2	39	41	159	560	885	1455	1250	3193
1	185	6000	2	39	39	187	530	850	1570	2130	2889
1	186	6000	2	39	41	211	543	1140	1290	1910	1865
1	187	6000	2	39	40	167	460	1110	1460	1750	2857
1	188	6000	2	39	37	162	600	895	1780	1950	3455
1	189	6000	2	39	40	201	450	1200	1680	2350	2013
1	190	6000	2	39	45	195	500	1260	1550	2150	2413
1	191	6000	2	39	41	199	521	1005	1580	1950	2805
1	192	6000	2	39	41	211	513	1050	1230	2115	2292
1	193	6000	2	39	40	179	470	1140	1360	1815	2618
1	194	6000	2	39	43	189	410	880	1380	2450	2462
1	195	6000	2	39	36	243	510	910	1880	1950	2363
1	196	6000	2	39	40	215	580	880	2130	1850	2462
1	197	6000	2	39	41	194	600	995	1360	2240	2688
1	198	6000	2	39	43	178	560	910	1630	1780	2412
1	199	6000	2	39	37	164	640	895	1570	1590	2491
1	200	6000	2	39	40	178	700	930	1630	1980	2642
1	201	6000	2	39	38	195	550	635	1825	1925	2292
1	202	6000	2	39	41	231	520	735	1480	1950	2171
1	203	6000	2	39	44	194	570	955	1680	2180	2932
1	204	6000	2	39	42	185	520	1005	1880	1520	2688
1	205	6000	2	39	41	165	510	1110	1360	2115	2483
1	206	6000	2	39	40	195	540	890	1420	1920	2224
1	207	6000	2	39	43	157	530	1020	1690	1675	2364
1	208	6000	2	39	44	169	542	1095	1365	1520	2379
1	209	6000	2	39	38	211	414	1055	1480	1920	2410
1	210	6000	2	39	40	187	572	920	1550	2040	3192
1	211	6000	2	39	41	164	543	990	1180	2350	2381
1	212	6000	2	39	39	159	545	1005	1095	2250	2402
1	213	6000	2	39	40	148	510	930	1360	1920	2725
1	214	6000	2	39	42	167	580	795	1520	2265	2360
1	215	6000	2	39	41	154	510	730	1340	2140	2750
1	216	6000	2	39	43	189	603	725	1580	2200	3157
1	217	6000	2	39	38	164	552	1020	1480	2390	2283
1	218	6000	2	39	41	187	470	1000	1760	1800	2406
1	219	6000	2	39	40	162	432	980	1580	2065	3012
1	220	6000	2	39	41	148	482	905	1530	2080	2426
1	221	6000	2	39	43	195	476	945	1360	2540	2943
1	222	6000	2	39	45	164	531	915	1380	2240	2065
1	223	6000	2	39	41	187	535	855	1580	2060	2363
1	224	6000	2	39	40	149	587	1070	1780	1890	3049
1	225	6000	2	39	45	137	506	865	1370	2030	2545
1	226	6000	2	39	47	158	440	1080	1580	2070	2298
1	227	6000	2	39	43	164	432	1095	1275	2200	2223
1	228	6000	2	39	40	201	480	795	1170	1795	2889
1	229	6000	2	39	46	159	461	1060	1280	1785	2215
1	230	6000	2	39	41	164	484	770	1420	2230	2817
1	231	6000	2	39	40	175	510	885	1630	1865	2560
1	232	6000	2	39	44	206	490	850	1520	2070	2972
1	233	6000	2	39	45	158	481	905	1630	2750	2397
1	234	6000	2	39	38	176	521	850	1565	1595	2434
1	235	6000	2	39	40	149	392	1070	1140	1960	2454
1	236	6000	2	39	47	164	410	915	1560	1820	2439
1	237	6000	2	39	41	187	420	1080	1640	1860	2980
1	238	6000	2	39	43	159	502	895	975	2750	2432
1	239	6000	2	39	40	195	452	1095	1065	2050	3167
1	240	6000	2	39	45	213	471	1065	1740	1170	2551
1	241	6000	2	39	43	178	531	885	980	1860	2901
1	242	6000	2	39	41	148	547	940	1760	2230	2517
1	243	6000	2	39	40	167	600	895	1420	2310	3392
1	244	6000	2	39	38	159	391	765	1460	1650	2531
1	245	6000	2	39	40	168	512	1115	1580	2000	2209
1	246	6000	2	39	39	216	520	1050	1480	2200	2257
1	247	6000	2	39	41	189	460	960	1720	2580	3217
1	248	6000	2	39	40	147	515	825	1580	2180	2473
1	249	6000	2	39	43	198	520	665	1370	1780	2205
1	250	6000	2	39	48	209	492	915	1420	2230	2476
1	251	6000	2	39	45	211	437	715	1580	1715	2540
1	252	6000	2	39	40	158	504	756	1560	2400	2941
1	253	6000	2	39	41	195	510	1185	1580	1780	2665
1	254	6000	2	39	45	194	490	665	1060	1950	2743
1	255	6000	2	39	40	204	460	745	1280	1900	2430
1	256	6000	2	39	38	187	530	515	1420	2150	2713
1	257	6000	2	39	39	167	540	860	1560	2040	2043
1	258	6000	2	39	41	159	490	1155	1780	2100	2443
1	259	6000	2	39	39	207	482	1000	975	1930	2236
1	260	6000	2	39	40	217	505	900	1030	2045	3013
1	261	6000	2	39	39	195	523	945	1180	1750	2640
1	262	6000	2	39	38	167	602	925	1690	2500	3232
1	263	6000	2	39	42	175	571	850	1590	2015	2787
1	264	6000	2	39	41	184	520	900	1560	1965	2860
1	265	6000	2	39	38	224	483	755	1480	1865	2400
1	266	6000	2	39	45	193	530	910	1580	1930	3344
1	267	6000	2	39	40	167	470	850	1660	2300	2574
1	268	6000	2	39	46	194	610	1115	1560	2040	2447
1	269	6000	2	39	42	158	520	845	1480	2610	2336
1	270	6000	2	39	41	179	510	1035	1600	1850	3472
1	271	6000	2	39	40	176	553	780	1480	1690	3287
1	272	6000	2	39	41	149	496	910	1490	2510	2392
1	273	6000	2	39	42	169	473	910	1660	2140	2780
1	274	6000	2	39	44	199	390	870	1480	2310	2360
1	275	6000	2	39	40	214	499	840	1480	1865	2874
1	276	6000	2	39	43	201	530	875	1590	1645	3151
1	277	6000	2	39	43	167	547	865	1460	2050	2450
1	278	6000	2	39	38	185	482	1005	1730	2345	2330
1	279	6000	2	39	41	194	469	730	1580	1905	3018
1	280	6000	2	39	41	167	507	725	1810	1565	2572
1	281	6000	2	39	42	197	520	1195	1865	1985	2575
1	282	6000	2	39	40	168	435	915	1740	2415	3080
1	283	6000	2	39	37	148	420	1050	1575	2200	2571
1	284	6000	2	39	40	204	487	1165	1545	1860	2302
1	285	6000	2	39	41	195	500	790	1365	1765	3370
1	286	6000	2	39	38	206	470	1025	1430	2150	2808
1	287	6000	2	39	40	187	511	1025	1155	2010	3003
1	288	6000	2	39	49	218	545	515	1360	1850	2326
1	289	6000	2	39	41	184	598	925	1530	2420	2550
1	290	6000	2	39	43	197	415	905	1360	2130	2566
1	291	6000	2	39	41	207	540	745	1650	2150	2425
1	292	6000	2	39	40	169	500	1080	1460	2140	2408
1	293	6000	2	39	45	178	510	775	1200	1970	3403
1	294	6000	2	39	41	239	523	930	1040	1680	2205
1	295	6000	2	39	43	218	480	790	960	1750	2180
1	296	6000	2	39	41	178	490	715	1320	1950	2186
1	297	6000	2	39	42	204	495	830	1210	1650	2120
1	298	6000	2	39	42	158	520	985	1070	2070	3221
1	299	6000	2	39	41	195	473	850	1000	2130	3094
1	300	6000	2	39	43	175	510	795	1590	2090	2330
1	1	20000	1	39	40	179	520	925	1270	1720	2478
1	2	20000	1	39	41	164	453	1050	1160	2510	2970
1	3	20000	1	39	42	194	610	1145	1280	1840	2750
1	4	20000	1	39	42	157	555	815	1420	1710	2515
1	5	20000	1	39	42	149	420	740	1630	2180	2480
1	6	20000	1	39	41	167	562	1020	1520	2405	2510
1	7	20000	1	39	43	201	351	1010	1580	1690	2690
1	8	20000	1	39	40	194	550	830	1565	2380	2380
1	9	20000	1	39	41	167	580	885	1140	2005	2460
1	10	20000	1	39	44	208	512	950	1560	1660	2860
1	11	20000	1	39	46	149	453	735	1590	2400	2050
1	12	20000	1	39	42	157	363	990	975	1560	1940
1	13	20000	1	39	41	194	425	825	1065	1700	2230
1	14	20000	1	39	44	167	460	1010	1740	1415	2480
1	15	20000	1	39	40	184	510	650	980	2070	2560
1	16	20000	1	39	39	194	472	995	1650	2080	2662
1	17	20000	1	39	40	207	580	885	1420	2685	2420
1	18	20000	1	39	38	184	390	915	1460	1370	2081
1	19	20000	1	39	42	167	520	830	1580	1875	2160
1	20	20000	1	39	41	189	390	855	1480	1980	2820
1	21	20000	1	39	40	147	576	1050	1150	2190	2881
1	22	20000	1	39	44	184	380	825	1580	1620	2910
1	23	20000	1	39	43	167	550	910	1370	2205	1895
1	24	20000	1	39	45	204	527	885	1420	2375	1910
1	25	20000	1	39	41	195	348	100	1460	1690	2817
1	26	20000	1	39	40	167	450	660	1560	2860	2750
1	27	20000	1	39	38	214	420	945	1580	2060	2351
1	28	20000	1	39	41	179	465	780	1060	1560	2424
1	29	20000	1	39	45	214	429	730	1280	2100	2729
1	30	20000	1	39	43	167	580	995	1600	2385	2218
1	31	20000	1	39	44	207	435	720	1660	1685	2092
1	32	20000	1	39	48	167	380	930	1420	1830	2383
1	33	20000	1	39	44	184	428	995	1780	1700	2410
1	34	20000	1	39	40	197	505	865	1650	1980	1906
1	35	20000	1	39	38	185	569	995	1570	1580	2260
1	36	20000	1	39	41	164	520	680	1560	1880	1987
1	37	20000	1	39	44	179	535	870	1780	1590	2180
1	38	20000	1	39	39	158	536	870	960	1870	2725
1	39	20000	1	39	50	149	589	840	1520	1820	2680
1	40	20000	1	39	48	167	590	960	1460	1725	2518
1	41	20000	1	39	44	157	440	610	1630	1890	2480
1	42	20000	1	39	41	148	581	770	1530	2110	2350
1	43	20000	1	39	43	218	420	795	1580	1515	2054
1	44	20000	1	39	42	167	551	720	1490	1625	2024
1	45	20000	1	39	44	207	510	810	1480	1680	2650
1	46	20000	1	39	42	159	504	535	1400	1970	2610
1	47	20000	1	39	41	167	484	795	1570	2110	1915
1	48	20000	1	39	40	149	520	840	1580	1515	2219
1	49	20000	1	39	41	157	575	595	1355	1680	2514
1	50	20000	1	39	40	197	510	600	1095	1970	2392
1	51	20000	1	39	39	206	480	875	1520	1395	2350
1	52	20000	1	39	41	187	475	995	1480	2070	2210
1	53	20000	1	39	43	207	510	835	1380	1760	3091
1	54	20000	1	39	44	167	465	1070	1120	1580	2670
1	55	20000	1	39	38	148	425	730	1680	1790	2580
1	56	20000	1	39	41	167	525	930	1460	2495	2060
1	57	20000	1	39	44	218	506	840	1520	1975	2550
1	58	20000	1	39	40	167	546	795	1850	2415	2552
1	59	20000	1	39	41	184	489	815	1580	1830	2332
1	60	20000	1	39	42	237	670	725	1400	1630	2796
1	61	20000	1	39	45	194	447	835	1620	2145	2724
1	62	20000	1	39	39	187	594	805	1520	2310	2628
1	63	20000	1	39	40	165	555	660	1480	2080	2510
1	64	20000	1	39	45	179	548	885	1230	2230	2670
1	65	20000	1	39	41	167	550	795	1120	1920	2759
1	66	20000	1	39	43	158	553	455	1560	1560	2100
1	67	20000	1	39	40	194	448	870	1340	2280	2370
1	68	20000	1	39	42	168	392	795	1720	1850	2240
1	69	20000	1	39	41	204	521	950	1520	2360	2820
1	70	20000	1	39	44	194	585	660	1420	1830	2370
1	71	20000	1	39	38	190	401	800	1220	1910	2402
1	72	20000	1	39	42	157	410	760	1080	2090	2390
1	73	20000	1	39	45	168	522	920	1630	2880	2010
1	74	20000	1	39	40	187	354	970	1090	2060	2857
1	75	20000	1	39	41	208	420	750	1480	2100	2970
1	76	20000	1	39	42	197	450	1135	950	2420	2860
1	77	20000	1	39	41	167	500	850	1520	1580	2945
1	78	20000	1	39	43	209	490	1005	1620	1700	2460
1	79	20000	1	39	45	178	500	870	1400	1520	2460
1	80	20000	1	39	40	149	410	680	1240	1800	2310
1	81	20000	1	39	41	150	440	975	1650	2610	3100
1	82	20000	1	39	43	194	444	815	1230	1940	2440
1	83	20000	1	39	45	187	520	850	1080	1900	2365
1	84	20000	1	39	39	209	414	985	1000	2330	2592
1	85	20000	1	39	40	159	480	660	1620	2390	2027
1	86	20000	1	39	41	187	500	820	1480	1665	2160
1	87	20000	1	39	44	173	442	890	1580	1620	2664
1	88	20000	1	39	45	190	480	925	1420	2665	2504
1	89	20000	1	39	42	171	347	845	1560	1770	2291
1	90	20000	1	39	37	204	350	950	1600	2200	2516
1	91	20000	1	39	44	187	380	865	1660	1995	3145
1	92	20000	1	39	38	149	420	880	1080	2345	2874
1	93	20000	1	39	42	193	470	870	1420	1705	2125
1	94	20000	1	39	40	214	362	980	960	1790	2584
1	95	20000	1	39	39	197	600	980	1200	1830	2025
1	96	20000	1	39	41	158	520	770	1060	1945	3270
1	97	20000	1	39	44	167	400	755	1490	1695	2210
1	98	20000	1	39	45	167	460	870	1650	2225	2718
1	99	20000	1	39	41	149	480	1015	1200	1940	2410
1	100	20000	1	39	40	187	420	650	1520	2245	2082
1	101	20000	1	39	45	167	530	960	1600	1905	2762
1	102	20000	1	39	40	158	480	960	980	2300	3050
1	103	20000	1	39	41	197	500	840	1000	1850	2840
1	104	20000	1	39	42	148	470	1055	1260	1930	2019
1	105	20000	1	39	43	167	400	1140	1450	1470	2450
1	106	20000	1	39	41	197	420	875	1600	1830	2410
1	107	20000	1	39	44	167	500	935	1520	2095	2566
1	108	20000	1	39	45	148	490	920	1220	2070	2068
1	109	20000	1	39	44	197	370	930	1120	2160	2874
1	110	20000	1	39	44	185	495	1065	1150	2330	2710
1	111	20000	1	39	42	167	480	930	1190	2500	2870
1	112	20000	1	39	40	194	490	930	1350	1640	2529
1	113	20000	1	39	41	201	510	955	1420	1820	2400
1	114	20000	1	39	40	168	510	940	1320	1660	2322
1	115	20000	1	39	40	204	490	965	1210	1890	2349
1	116	20000	1	39	41	195	540	1130	1310	2570	2909
1	117	20000	1	39	46	162	550	955	1400	2040	2770
1	118	20000	1	39	42	157	490	910	1620	2410	2702
1	119	20000	1	39	43	194	520	1180	1520	1695	2522
1	120	20000	1	39	41	209	510	1125	1280	2050	2422
1	121	20000	1	39	42	194	490	845	1600	1865	2490
1	122	20000	1	39	42	216	520	780	1350	2080	2570
1	123	20000	1	39	44	185	510	830	1400	2140	2712
1	124	20000	1	39	41	204	520	945	1500	1950	2949
1	125	20000	1	39	40	148	520	870	1120	1750	2460
1	126	20000	1	39	38	167	496	1145	1610	1685	2206
1	127	20000	1	39	42	164	447	740	1130	2040	2458
1	128	20000	1	39	41	179	441	1245	1250	2160	2512
1	129	20000	1	39	40	167	600	905	1360	2250	2516
1	130	20000	1	39	45	158	480	1125	1200	2170	2440
1	131	20000	1	39	37	194	490	1005	1450	1985	2305
1	132	20000	1	39	40	178	446	1005	1580	1765	2554
1	133	20000	1	39	38	174	490	845	1680	2080	2079
1	134	20000	1	39	40	168	500	915	1120	1980	2250
1	135	20000	1	39	39	149	544	750	1430	1580	2480
1	136	20000	1	39	41	167	524	1230	1630	2240	2545
1	137	20000	1	39	41	195	450	870	1225	2160	3070
1	138	20000	1	39	42	209	488	715	1200	2410	2810
1	139	20000	1	39	37	197	600	1005	1360	2150	3346
1	140	20000	1	39	40	185	604	1035	1250	1840	2368
1	141	20000	1	39	39	167	470	855	1450	1740	2397
1	142	20000	1	39	37	185	475	945	1580	2140	2920
1	143	20000	1	39	40	158	370	845	1480	2180	2870
1	144	20000	1	39	45	167	400	815	1520	1680	2772
1	145	20000	1	39	41	162	470	715	1300	2170	2140
1	146	20000	1	39	38	145	560	795	1210	2150	2298
1	147	20000	1	39	40	167	385	1035	1320	2260	3367
1	148	20000	1	39	43	185	448	785	1420	1980	2351
1	149	20000	1	39	38	216	400	1085	1320	1780	2392
1	150	20000	1	39	41	197	500	855	1450	2140	2076
2	1	4000	1	41	44	235	630	1230	1780	3020	2610
2	2	4000	1	41	48	235	580	1040	1610	2280	3170
2	3	4000	1	41	52	201	590	1110	1790	2820	3490
2	4	4000	1	41	50	163	490	930	1990	2920	2450
2	5	4000	1	41	47	199	680	1220	2290	2820	3390
2	6	4000	1	41	44	187	590	1210	1650	2320	2700
2	7	4000	1	41	45	189	430	1050	1640	1960	3140
2	8	4000	1	41	48	262	530	1290	1750	2800	2690
2	9	4000	1	41	42	209	500	950	1810	2140	2700
2	10	4000	1	41	44	175	380	780	1720	2140	3140
2	11	4000	1	41	46	216	590	1300	1950	2560	2330
2	12	4000	1	41	44	240	570	1020	1650	2920	2960
2	13	4000	1	41	50	262	530	870	1500	2580	2760
2	14	4000	1	41	52	203	570	1040	1550	1960	2450
2	15	4000	1	41	44	230	570	1090	2100	2340	2620
2	16	4000	1	41	48	237	400	1160	2240	2340	1890
2	17	4000	1	41	47	168	660	1090	1780	1960	2910
2	18	4000	1	41	42	164	450	990	1950	2840	2670
2	19	4000	1	41	43	164	610	850	1420	2920	2510
2	20	4000	1	41	45	144	550	1070	1930	2120	2520
2	21	4000	1	41	49	203	450	1080	1420	2600	2470
2	22	4000	1	41	41	196	580	1160	1620	2400	2540
2	23	4000	1	41	42	218	570	990	1560	2660	1950
2	24	4000	1	41	45	246	640	1050	1460	2800	2540
2	25	4000	1	41	44	138	580	1240	1690	2320	2520
2	26	4000	1	41	50	220	450	1210	1610	2300	2470
2	27	4000	1	41	51	202	680	840	1620	1560	2450
2	28	4000	1	41	44	197	580	970	1720	3020	3290
2	29	4000	1	41	48	189	620	1150	2010	2440	2730
2	30	4000	1	41	46	214	570	900	2040	2220	2400
2	31	4000	1	41	47	169	480	1040	1700	2520	3590
2	32	4000	1	41	42	172	510	1190	1580	2680	2880
2	33	4000	1	41	39	168	480	740	1780	2520	2780
2	34	4000	1	41	42	175	520	980	1640	2020	2730
2	35	4000	1	41	45	196	580	1100	2100	2400	2700
2	36	4000	1	41	42	185	480	930	2040	1960	2850
2	37	4000	1	41	47	201	530	960	1720	2920	2450
2	38	4000	1	41	46	216	700	1060	1950	2280	2380
2	39	4000	1	41	44	185	440	1180	1810	2820	2940
2	40	4000	1	41	52	174	490	1240	1780	2320	2680
2	41	4000	1	41	50	169	500	980	1610	2580	2660
2	42	4000	1	41	48	157	600	1210	1990	1960	3410
2	43	4000	1	41	51	195	460	950	2120	2340	2450
2	44	4000	1	41	42	184	490	1120	1860	2120	2480
2	45	4000	1	41	54	153	470	1080	1940	1660	2540
2	46	4000	1	41	42	187	500	950	1560	1460	2300
2	47	4000	1	41	44	204	370	1070	1620	2800	1970
2	48	4000	1	41	45	191	480	890	1780	1300	2840
2	49	4000	1	41	44	174	650	1200	1990	1790	2560
2	50	4000	1	41	43	165	550	1140	1770	2440	3190
2	51	4000	1	41	52	185	540	1040	2150	2310	2510
2	52	4000	1	41	50	164	630	1210	1560	2020	2480
2	53	4000	1	41	51	162	520	850	1640	2100	2560
2	54	4000	1	41	42	182	480	930	1950	1960	2940
2	55	4000	1	41	48	193	460	780	1650	2040	3010
2	56	4000	1	41	45	204	380	1210	2210	2580	2530
2	57	4000	1	41	43	215	580	950	1940	2300	2860
2	58	4000	1	41	41	149	680	1090	1690	2340	2650
2	59	4000	1	41	45	182	430	1020	1860	1980	2900
2	60	4000	1	41	42	185	450	780	1570	2580	2510
2	61	4000	1	41	44	176	60	1070	1650	2920	2460
2	62	4000	1	41	47	134	570	1080	2130	2800	2850
2	63	4000	1	41	45	159	590	840	2040	2600	3120
2	64	4000	1	41	42	174	510	970	1950	2440	2840
2	65	4000	1	41	43	173	640	900	1760	2520	2430
2	66	4000	1	41	42	158	530	1040	1590	1960	2510
2	67	4000	1	41	40	204	490	980	2080	2310	2860
2	68	4000	1	41	41	216	650	1100	1930	1860	2970
2	69	4000	1	41	42	240	660	960	2130	2020	2610
2	70	4000	1	41	44	150	470	1040	1930	2100	2450
2	71	4000	1	41	42	146	490	1200	2080	1950	2780
2	72	4000	1	41	45	204	570	1240	1950	2090	2460
2	73	4000	1	41	43	263	560	850	1830	2640	2510
2	74	4000	1	41	44	248	490	940	2120	2300	2940
2	75	4000	1	41	46	152	440	760	1760	2150	3160
2	76	4000	1	41	50	143	700	1230	1540	1860	3210
2	77	4000	1	41	51	180	530	1050	1490	2340	2700
2	78	4000	1	41	42	165	600	890	1650	2340	2610
2	79	4000	1	41	42	175	500	940	1830	2100	2900
2	80	4000	1	41	45	195	610	1090	1490	1960	2460
2	81	4000	1	41	43	148	590	1070	1790	2050	2910
2	82	4000	1	41	45	163	530	100	1860	2520	3160
2	83	4000	1	41	44	185	570	980	2040	2320	2840
2	84	4000	1	41	46	129	430	780	1950	2820	2520
2	85	4000	1	41	42	201	490	950	2070	2280	3120
2	86	4000	1	41	40	216	620	1080	1980	3020	2530
2	87	4000	1	41	41	175	530	950	1590	2140	2940
2	88	4000	1	41	42	193	520	1240	2070	1960	2380
2	89	4000	1	41	43	184	600	1100	1970	2840	2860
2	90	4000	1	41	45	231	610	850	1770	2920	2720
2	91	4000	1	41	44	248	470	1110	2070	2120	2980
2	92	4000	1	41	45	169	570	790	1830	2460	2530
2	93	4000	1	41	42	158	510	940	2030	2800	2410
2	94	4000	1	41	46	148	530	860	1990	2320	2620
2	95	4000	1	41	42	165	460	1080	1780	2140	2860
2	96	4000	1	41	41	195	490	1210	1820	2190	2390
2	97	4000	1	41	42	178	610	1300	1800	2270	2480
2	98	4000	1	41	42	185	480	850	1930	2040	2920
2	99	4000	1	41	40	196	550	760	2070	1980	3180
2	100	4000	1	41	45	158	620	950	2010	2160	2570
2	101	4000	2	41	42	195	590	1270	1440	2340	2180
2	102	4000	2	41	45	240	610	1110	1610	2600	3800
2	103	4000	2	41	43	158	390	1200	2070	2140	2450
2	104	4000	2	41	42	196	490	1230	1930	3000	3720
2	105	4000	2	41	45	175	510	840	1740	2520	3120
2	106	4000	2	41	40	205	620	980	1660	3200	2640
2	107	4000	2	41	44	218	580	1320	1730	2640	2690
2	108	4000	2	41	45	175	660	1110	1820	2820	3230
2	109	4000	2	41	42	186	430	950	1290	2860	2320
2	110	4000	2	41	46	149	590	1070	1650	2660	2680
2	111	4000	2	41	42	153	450	1340	1420	2500	3820
2	112	4000	2	41	43	128	480	790	1860	2940	2710
2	113	4000	2	41	41	159	500	970	1490	2460	2320
2	114	4000	2	41	45	165	450	1240	1760	2500	3500
2	115	4000	2	41	42	204	530	1000	1780	2380	3200
2	116	4000	2	41	45	158	460	1260	1890	2680	3300
2	117	4000	2	41	44	166	620	1060	1570	2360	3220
2	118	4000	2	41	43	148	540	1230	1720	2480	2560
2	119	4000	2	41	47	177	520	930	1520	2460	3200
2	120	4000	2	41	42	158	540	1100	1980	2260	2800
2	121	4000	2	41	48	149	640	1150	1830	2500	2480
2	122	4000	2	41	49	165	340	1050	1710	2800	2910
2	123	4000	2	41	46	155	530	1260	1670	2580	3150
2	124	4000	2	41	42	198	530	1150	1720	2100	3140
2	125	4000	2	41	42	218	540	1070	2150	2380	2300
2	126	4000	2	41	41	195	500	900	2160	2900	2550
2	127	4000	2	41	42	178	410	1080	1770	2840	2830
2	128	4000	2	41	43	216	490	840	1710	1780	3130
2	129	4000	2	41	42	148	610	810	1610	2740	2590
2	130	4000	2	41	43	159	380	1180	1440	2820	3650
2	131	4000	2	41	46	153	580	1200	1470	2380	2800
2	132	4000	2	41	45	168	510	810	1940	2420	2380
2	133	4000	2	41	45	156	570	1200	1560	2540	2850
2	134	4000	2	41	42	165	430	950	1720	2740	2560
2	135	4000	2	41	43	162	570	810	1440	2340	3370
2	136	4000	2	41	42	169	430	1090	1950	2140	3140
2	137	4000	2	41	45	176	570	1250	1670	2520	2560
2	138	4000	2	41	42	185	390	809	1410	2640	3170
2	139	4000	2	41	47	162	610	1030	1850	2660	2920
2	140	4000	2	41	42	139	560	1090	1670	2380	2530
2	141	4000	2	41	45	185	580	1320	2070	2360	2690
2	142	4000	2	41	41	201	540	1090	1860	2480	2400
2	143	4000	2	41	43	208	630	980	1420	2260	2290
2	144	4000	2	41	45	186	590	1200	1960	2580	3400
2	145	4000	2	41	42	149	410	1150	1380	2820	3220
2	146	4000	2	41	44	165	390	1200	1750	2100	2440
2	147	4000	2	41	42	163	420	950	2030	2920	2730
2	148	4000	2	41	42	166	450	790	1850	2380	2810
2	149	4000	2	41	44	185	400	840	1470	2480	2500
2	150	4000	2	41	48	164	610	1120	1650	1780	2580
2	151	4000	2	41	45	204	540	1110	1990	2420	2950
2	152	4000	2	41	45	194	430	1350	1440	2820	3200
2	153	4000	2	41	45	208	560	1230	1850	2600	2750
2	154	4000	2	41	47	175	510	840	1880	2340	3220
2	155	4000	2	41	47	186	370	1040	1370	2350	2650
2	156	4000	2	41	50	207	390	1090	1860	2160	2560
2	157	4000	2	41	45	195	510	1240	1940	2340	2780
2	158	4000	2	41	42	163	470	950	2010	2080	3120
2	159	4000	2	41	50	178	430	1150	2100	1980	2860
2	160	4000	2	41	51	146	480	1260	1780	2150	2540
2	161	4000	2	41	42	185	650	900	2120	2310	2980
2	162	4000	2	41	48	204	400	1080	1950	2170	3300
2	163	4000	2	41	46	209	380	790	1750	2280	3120
2	164	4000	2	41	45	185	450	1020	1620	2040	2850
2	165	4000	2	41	42	163	450	1120	1930	1780	2460
2	166	4000	2	41	45	187	480	1320	1770	2350	2650
2	167	4000	2	41	49	156	510	1230	1850	2160	3040
2	168	4000	2	41	43	175	500	1090	1620	2820	2580
2	169	4000	2	41	47	144	420	940	1480	2090	3100
2	170	4000	2	41	50	195	490	1200	1680	2280	2490
2	171	4000	2	41	51	138	430	1040	1420	1860	2960
2	172	4000	2	41	45	204	390	1010	1580	2260	2450
2	173	4000	2	41	46	158	420	1280	1960	2340	2950
2	174	4000	2	41	45	221	480	970	1580	2180	2780
2	175	4000	2	41	52	218	450	840	1850	2520	3180
2	176	4000	2	41	45	195	410	890	1620	2160	2990
2	177	4000	2	41	52	148	430	1000	1850	2370	2860
2	178	4000	2	41	42	135	520	1070	1630	2450	2750
2	179	4000	2	41	46	185	530	1120	1720	1950	2460
2	180	4000	2	41	48	129	450	1110	1820	2380	2800
2	181	4000	2	41	50	158	480	1230	2040	2270	2780
2	182	4000	2	41	47	194	340	1020	1900	2080	2600
2	183	4000	2	41	45	204	530	950	1740	2240	3140
2	184	4000	2	41	52	195	410	1240	1680	2680	2710
2	185	4000	2	41	43	185	430	1090	1570	2170	2360
2	186	4000	2	41	46	216	470	990	1480	2380	2780
2	187	4000	2	41	42	158	580	1230	1330	2450	2920
2	188	4000	2	41	48	201	560	1030	1760	2290	2530
2	189	4000	2	41	45	240	510	1090	1850	2190	2970
2	190	4000	2	41	41	186	420	950	1460	1980	3100
2	191	4000	2	41	50	195	490	1070	1260	2070	3150
2	192	4000	2	41	42	175	520	1240	1920	1760	2560
2	193	4000	2	41	45	138	610	900	1820	2180	2780
2	194	4000	2	41	42	185	450	990	1460	2060	3220
2	195	4000	2	41	48	178	510	1230	1730	1860	2860
2	196	4000	2	41	42	169	450	1010	1530	2350	2710
2	197	4000	2	41	46	185	410	1100	1980	2170	2490
2	198	4000	2	41	42	165	520	1200	1520	1860	3230
2	199	4000	2	41	48	145	530	1300	2010	2180	2490
2	200	4000	2	41	45	138	390	1270	1720	2250	2670
2	201	4000	3	41	45	229	560	1250	2080	2900	2400
2	202	4000	3	41	47	211	690	1230	2000	2180	2450
2	203	4000	3	41	41	217	610	960	1350	3060	2300
2	204	4000	3	41	42	225	660	870	1920	2620	3480
2	205	4000	3	41	43	135	610	1050	2010	2360	3200
2	206	4000	3	41	45	224	650	1100	1250	1880	3260
2	207	4000	3	41	48	216	600	970	1740	2960	2460
2	208	4000	3	41	42	226	450	1120	2050	2680	2960
2	209	4000	3	41	39	234	480	1020	1410	2260	2770
2	210	4000	3	41	42	150	660	970	1640	2320	2700
2	211	4000	3	41	39	150	540	970	1870	2080	2400
2	212	4000	3	41	46	157	490	840	1760	2660	3380
2	213	4000	3	41	46	216	530	1020	1890	2660	3370
2	214	4000	3	41	52	204	590	1230	1710	2360	2520
2	215	4000	3	41	41	198	560	870	1620	2260	2680
2	216	4000	3	41	43	167	560	1060	2030	2480	2400
2	217	4000	3	41	47	196	490	1280	2080	2400	3230
2	218	4000	3	41	42	196	670	1250	1870	2820	2750
2	219	4000	3	41	46	213	610	1190	2030	2800	2710
2	220	4000	3	41	39	179	650	1160	1540	2100	3340
2	221	4000	3	41	38	165	590	1090	1780	2720	2660
2	222	4000	3	41	52	243	580	1080	1930	2300	3150
2	223	4000	3	41	42	144	540	1120	1870	2620	2380
2	224	4000	3	41	43	177	720	1220	1690	2400	3140
2	225	4000	3	41	48	217	560	940	1790	2540	2320
2	226	4000	3	41	43	189	570	1190	1980	2260	2800
2	227	4000	3	41	52	217	500	1270	1860	2060	3380
2	228	4000	3	41	41	179	650	950	1580	3200	2930
2	229	4000	3	41	47	165	420	1220	1690	2260	2830
2	230	4000	3	41	42	186	430	960	1970	2400	3400
2	231	4000	3	41	46	206	310	1050	1690	2140	2750
2	232	4000	3	41	52	233	610	1020	1990	2200	2390
2	233	4000	3	41	53	203	450	1230	1750	2160	2930
2	234	4000	3	41	52	208	610	970	1850	2380	3260
2	235	4000	3	41	50	189	550	1120	1370	2100	2430
2	236	4000	3	41	47	241	650	1060	1570	2150	2360
2	237	4000	3	41	45	226	610	1070	1990	1770	2620
2	238	4000	3	41	42	197	550	1090	1750	2260	3240
2	239	4000	3	41	48	185	580	1160	2070	2150	2470
2	240	4000	3	41	42	166	570	980	1890	2190	2920
2	241	4000	3	41	48	184	560	1170	2040	2280	2390
2	242	4000	3	41	42	159	580	940	1850	2580	3500
2	243	4000	3	41	46	176	640	1210	1760	2170	2620
2	244	4000	3	41	42	204	720	960	1380	1980	2390
2	245	4000	3	41	48	203	590	1270	2100	2080	2730
2	246	4000	3	41	42	218	570	890	1860	2540	3410
2	247	4000	3	41	41	159	460	1040	1900	2300	2840
2	248	4000	3	41	46	186	450	1230	1840	2620	2580
2	249	4000	3	41	52	174	580	1040	1730	2400	3270
2	250	4000	3	41	50	171	630	950	1920	2140	2730
2	251	4000	3	41	45	195	510	870	2030	2260	2810
2	252	4000	3	41	43	186	570	1050	2070	2060	3120
2	253	4000	3	41	52	208	490	1070	1950	2000	3200
2	254	4000	3	41	46	218	680	1120	1780	2720	2750
2	255	4000	3	41	45	195	520	980	1620	2660	2830
2	256	4000	3	41	45	146	670	1210	1920	2320	2960
2	257	4000	3	41	41	186	430	1110	1640	2260	2450
2	258	4000	3	41	48	178	320	1080	2050	2480	3140
2	259	4000	3	41	49	164	480	1060	1800	2360	2650
2	260	4000	3	41	42	128	570	1200	1750	3060	2980
2	261	4000	3	41	50	195	530	1280	1630	2220	2560
2	262	4000	3	41	51	175	560	1080	1820	2850	2340
2	263	4000	3	41	42	186	650	1220	1700	2200	2460
2	264	4000	3	41	48	159	660	1120	1710	2160	3130
2	265	4000	3	41	46	215	610	980	1820	2030	3320
2	266	4000	3	41	52	193	500	960	1500	1980	2580
2	267	4000	3	41	42	176	600	1200	1680	1970	2970
2	268	4000	3	41	47	184	640	1050	1950	2260	2560
2	269	4000	3	41	40	181	590	1090	1750	2680	3160
2	270	4000	3	41	41	165	570	840	1780	2450	2450
2	271	4000	3	41	46	178	490	1230	1970	2410	2670
2	272	4000	3	41	43	138	560	1100	1490	2360	2880
2	273	4000	3	41	42	169	480	1070	1680	2040	2640
2	274	4000	3	41	50	148	520	940	1570	2180	3210
2	275	4000	3	41	51	159	610	1210	1430	2390	2760
2	276	4000	3	41	48	201	660	1100	1820	2200	2560
2	277	4000	3	41	49	186	570	1070	2070	2760	3200
2	278	4000	3	41	52	195	580	970	2100	2150	3100
2	279	4000	3	41	47	193	490	1190	1800	2350	2850
2	280	4000	3	41	45	176	380	1240	2120	2180	2490
2	281	4000	3	41	46	211	430	1300	1930	2050	2570
2	282	4000	3	41	42	243	490	1270	2030	2180	2990
2	283	4000	3	41	43	185	650	1010	2180	1950	2580
2	284	4000	3	41	48	162	610	980	1750	1870	3150
2	285	4000	3	41	42	175	380	1200	1950	2190	2660
2	286	4000	3	41	42	164	490	1040	2060	1760	2470
2	287	4000	3	41	48	182	480	1090	2140	2280	3140
2	288	4000	3	41	45	195	580	990	1850	1860	2570
2	289	4000	3	41	42	178	510	900	1490	2680	2550
2	290	4000	3	41	41	185	570	1200	1570	2450	3220
2	291	4000	3	41	43	146	490	1050	2150	2190	3450
2	292	4000	3	41	46	183	380	1320	1900	2380	2850
2	293	4000	3	41	42	146	610	1200	1760	2750	2790
2	294	4000	3	41	45	158	670	1220	1860	2150	2990
2	295	4000	3	41	42	195	700	1070	2070	2160	3350
2	296	4000	3	41	40	208	480	970	1930	2090	2750
2	297	4000	3	41	41	204	620	1210	1880	1890	2680
2	298	4000	3	41	42	158	530	1320	2100	2340	3340
2	299	4000	3	41	43	192	490	1120	1980	2150	2580
2	300	4000	3	41	45	175	390	1080	1690	2390	2490
2	1	20000	2	41	44	148	510	1090	1760	2740	3100
2	2	20000	2	41	45	168	640	1250	1820	2960	3340
2	3	20000	2	41	42	149	660	1280	2020	2700	2460
2	4	20000	2	41	49	158	330	1040	1600	2560	2640
2	5	20000	2	41	45	192	630	1040	1630	1740	2450
2	6	20000	2	41	41	178	500	1260	2010	1580	2990
2	7	20000	2	41	43	193	600	1045	2060	2240	2500
2	8	20000	2	41	52	185	470	930	1510	2800	2670
2	9	20000	2	41	54	176	570	800	1540	2780	2470
2	10	20000	2	41	45	148	770	1195	2170	2160	3440
2	11	20000	2	41	41	180	620	880	1940	2180	2550
2	12	20000	2	41	42	195	640	1210	1700	1720	3200
2	13	20000	2	41	43	204	590	1135	1530	2860	2480
2	14	20000	2	41	45	195	600	1215	2060	3000	3450
2	15	20000	2	41	41	187	650	1080	2070	1760	2370
2	16	20000	2	41	42	209	450	1265	1630	1980	3100
2	17	20000	2	41	45	185	520	865	1940	2380	2510
2	18	20000	2	41	42	176	580	1000	1910	2600	2860
2	19	20000	2	41	46	209	650	1050	1490	2120	2750
2	20	20000	2	41	41	211	710	1210	1730	2400	2320
2	21	20000	2	41	42	177	570	960	1570	2300	3110
2	22	20000	2	41	48	195	470	1270	1600	2400	3160
2	23	20000	2	41	45	175	590	890	2050	3160	3330
2	24	20000	2	41	42	164	480	1040	1640	2000	2630
2	25	20000	2	41	46	183	640	1230	2020	2280	3230
2	26	20000	2	41	42	159	640	1040	1480	2100	2320
2	27	20000	2	41	41	215	490	950	1850	2500	2350
2	28	20000	2	41	42	195	590	870	1670	2480	3170
2	29	20000	2	41	39	176	510	1050	1360	2260	2530
2	30	20000	2	41	38	174	530	1280	2120	2700	2820
2	31	20000	2	41	45	183	460	1200	1370	2640	3480
2	32	20000	2	41	52	158	540	1080	1700	2700	2100
2	33	20000	2	41	42	234	650	1070	1770	2260	3400
2	34	20000	2	41	45	186	600	1230	1800	2860	2480
2	35	20000	2	41	42	251	540	1320	2250	2680	3400
2	36	20000	2	41	41	189	560	1000	1520	2420	3190
2	37	20000	2	41	43	247	590	980	1480	2640	2600
2	38	20000	2	41	46	163	520	1200	1640	2660	2920
2	39	20000	2	41	39	176	520	1250	1710	1860	2410
2	40	20000	2	41	52	186	620	1340	1690	2860	2900
2	41	20000	2	41	48	195	450	1080	1730	2040	3340
2	42	20000	2	41	47	185	600	930	1710	3020	2780
2	43	20000	2	41	41	193	610	1280	1450	2700	2380
2	44	20000	2	41	43	194	610	1050	1890	2500	3220
2	45	20000	2	41	44	185	590	1070	1490	2280	2720
2	46	20000	2	41	42	192	490	1080	1590	2900	1900
2	47	20000	2	41	45	184	500	1250	1990	3020	2390
2	48	20000	2	41	44	176	560	980	1450	2840	2350
2	49	20000	2	41	42	182	540	1240	1670	2900	3200
2	50	20000	2	41	41	173	610	1320	1700	2080	3800
2	51	20000	2	41	43	192	520	1070	1450	2680	3180
2	52	20000	2	41	46	185	610	970	1750	2220	2620
2	53	20000	2	41	42	146	510	760	1560	2120	2700
2	54	20000	2	41	48	201	560	1080	1110	2200	2780
2	55	20000	2	41	45	186	400	1030	1420	1740	2350
2	56	20000	2	41	45	203	530	1100	1430	2560	3700
2	57	20000	2	41	45	219	660	1200	1550	1980	2490
2	58	20000	2	41	50	195	530	1210	1870	2180	2620
2	59	20000	2	41	42	183	520	1320	1320	2400	2490
2	60	20000	2	41	42	147	640	1240	1600	2160	2500
2	61	20000	2	41	42	196	590	1080	1660	2300	2450
2	62	20000	2	41	43	204	540	1040	1720	2000	2380
2	63	20000	2	41	41	183	570	890	2020	2100	2950
2	64	20000	2	41	45	150	470	990	1650	2410	2860
2	65	20000	2	41	42	159	560	1090	1830	2700	2560
2	66	20000	2	41	43	147	600	1110	2010	2680	2870
2	67	20000	2	41	42	160	620	1210	2060	2260	2470
2	68	20000	2	41	48	189	680	1080	1410	2640	2940
2	69	20000	2	41	45	138	400	950	1640	3020	2580
2	70	20000	2	41	42	158	630	1080	2070	2900	2460
2	71	20000	2	41	46	164	650	1210	1840	2120	2410
2	72	20000	2	41	46	189	570	1100	1790	2200	3140
2	73	20000	2	41	50	168	720	1210	1630	2450	3250
2	74	20000	2	41	52	196	720	1270	2060	2080	2950
2	75	20000	2	41	42	176	440	1340	2070	2300	2780
2	76	20000	2	41	41	204	420	1280	1430	1850	2450
2	77	20000	2	41	45	195	600	1040	1840	2190	3120
2	78	20000	2	41	43	208	540	1250	1810	2360	2480
2	79	20000	2	41	48	159	550	1210	1590	1980	3400
2	80	20000	2	41	44	216	590	1020	1630	2750	2770
2	81	20000	2	41	52	176	430	980	1770	2680	2860
2	82	20000	2	41	42	185	510	970	1600	2190	2410
2	83	20000	2	41	46	193	640	1010	2090	2580	2390
2	84	20000	2	41	50	158	550	1070	1540	2340	2580
2	85	20000	2	41	42	164	530	950	2020	1570	2690
2	86	20000	2	41	41	186	510	1070	1580	1960	3130
2	87	20000	2	41	46	149	650	1080	1750	2250	2540
2	88	20000	2	41	48	189	560	1210	1570	2070	2560
2	89	20000	2	41	42	204	700	780	1560	2360	3120
2	90	20000	2	41	45	195	420	1070	2020	2470	3100
2	91	20000	2	41	44	216	640	850	1470	2190	2450
2	92	20000	2	41	50	243	470	1090	1710	2590	2980
2	93	20000	2	41	42	185	290	1070	1770	2980	2650
2	94	20000	2	41	49	165	690	940	1850	3080	2410
2	95	20000	2	41	43	185	540	1210	2150	2180	2970
2	96	20000	2	41	47	176	500	1160	1580	2010	2310
2	97	20000	2	41	41	185	540	930	1480	1760	2580
2	98	20000	2	41	42	149	500	1080	1740	2180	2640
2	99	20000	2	41	45	215	740	1250	1790	2360	2140
2	100	20000	2	41	42	186	530	1180	1590	2860	2250
2	101	20000	2	41	46	197	580	1200	1430	2170	3100
2	102	20000	2	41	42	148	600	980	1610	2290	3210
2	103	20000	2	41	41	208	670	1050	1850	2040	2470
2	104	20000	2	41	43	195	490	1120	1590	1580	2940
2	105	20000	2	41	41	176	720	1080	1790	2340	2560
2	106	20000	2	41	43	153	590	1090	1590	2210	2460
2	107	20000	2	41	48	189	580	970	1890	2040	2860
2	108	20000	2	41	54	147	520	930	1550	1980	2470
2	109	20000	2	41	42	183	390	1090	1670	2540	2490
2	110	20000	2	41	46	207	570	1280	1750	2360	2950
2	111	20000	2	41	41	194	560	1320	1550	2490	2370
2	112	20000	2	41	45	177	570	1070	1650	2570	2350
2	113	20000	2	41	42	168	490	1100	1560	1980	2410
2	114	20000	2	41	46	168	520	1030	1100	2170	2980
2	115	20000	2	41	46	204	690	920	1420	1960	3100
2	116	20000	2	41	42	195	730	1080	1530	1670	2640
2	117	20000	2	41	41	183	550	1010	1640	2080	2430
2	118	20000	2	41	42	176	560	1090	1470	2480	2350
2	119	20000	2	41	48	185	440	1210	1520	2150	2970
2	120	20000	2	41	44	149	590	850	1600	2670	3140
2	121	20000	2	41	45	206	510	940	1460	2180	2560
2	122	20000	2	41	46	225	690	1080	1420	2050	3150
2	123	20000	2	41	44	178	480	1110	2120	2170	2450
2	124	20000	2	41	42	195	720	1070	1700	1900	2980
2	125	20000	2	41	43	178	520	1310	1530	2170	2470
2	126	20000	2	41	41	159	920	1000	2110	2350	2530
2	127	20000	2	41	47	186	710	950	2090	2170	3200
2	128	20000	2	41	48	159	480	1080	1410	2950	3140
2	129	20000	2	41	52	174	390	960	1640	2670	2470
2	130	20000	2	41	42	186	580	760	2170	1490	2350
2	131	20000	2	41	51	182	470	1080	1740	2380	3240
2	132	20000	2	41	40	196	700	1070	1770	2170	2400
2	133	20000	2	41	42	213	690	1060	1430	2250	2510
2	134	20000	2	41	41	241	620	950	2160	2390	3100
2	135	20000	2	41	50	185	580	1050	2010	2480	2420
2	136	20000	2	41	41	167	600	1070	1530	2180	3210
2	137	20000	2	41	45	189	490	950	1840	2100	2400
2	138	20000	2	41	48	149	570	1070	1700	2140	2610
2	139	20000	2	41	43	157	630	1060	1510	1920	3100
2	140	20000	2	41	51	168	550	950	1690	2180	2890
2	141	20000	2	41	41	195	490	780	1490	1850	2500
2	142	20000	2	41	42	194	660	1040	1610	2360	2430
2	143	20000	2	41	47	193	720	910	2050	2170	2450
2	144	20000	2	41	40	190	580	870	1630	2760	2960
2	145	20000	2	41	48	181	520	1080	2120	2480	2860
2	146	20000	2	41	43	171	490	1210	1840	2950	2430
2	147	20000	2	41	46	201	380	950	1580	2860	3160
2	148	20000	2	41	51	219	490	1070	1760	2140	2450
2	149	20000	2	41	52	189	440	1020	1460	2190	2950
2	150	20000	2	41	40	183	410	950	2020	2080	2480
3	1	3000	1	39	47	180	540	990	1380	2520	2140
3	2	3000	1	39	44	170	570	940	1480	2140	2320
3	3	3000	1	39	45	180	530	1020	1280	2520	1820
3	4	3000	1	39	48	210	350	910	1520	2020	2580
3	5	3000	1	39	42	160	540	870	1560	2400	1980
3	6	3000	1	39	44	140	510	1070	1660	1960	2240
3	7	3000	1	39	46	180	440	920	1540	2350	2480
3	8	3000	1	39	44	190	560	850	1480	2280	2460
3	9	3000	1	39	50	150	590	1040	1760	2070	2380
3	10	3000	1	39	52	170	490	950	1520	2320	2240
3	11	3000	1	39	44	160	480	940	1720	2580	2300
3	12	3000	1	39	48	180	560	980	1480	1960	2400
3	13	3000	1	39	47	210	570	1080	1280	2340	2080
3	14	3000	1	39	42	200	460	950	1660	2120	2380
3	15	3000	1	39	43	180	590	1060	1480	1660	1920
3	16	3000	1	39	45	170	420	960	1320	1460	2760
3	17	3000	1	39	49	160	520	990	1580	2280	2320
3	18	3000	1	39	41	170	380	930	1500	1300	2600
3	19	3000	1	39	42	140	430	1030	1320	1790	2960
3	20	3000	1	39	45	190	400	910	1850	2440	2160
3	21	3000	1	39	44	130	530	1080	1640	2150	1920
3	22	3000	1	39	50	150	420	840	1360	1860	2540
3	23	3000	1	39	51	180	690	940	1600	2340	2320
3	24	3000	1	39	44	190	540	1070	1580	2340	2460
3	25	3000	1	39	48	210	330	980	1690	2100	2060
3	26	3000	1	39	46	180	580	950	1480	1960	2130
3	27	3000	1	39	47	160	680	910	1410	2050	2050
3	28	3000	1	39	42	170	420	890	1300	2520	1920
3	29	3000	1	39	39	140	600	1080	1480	2320	2070
3	30	3000	1	39	42	180	390	890	1650	2400	2640
3	31	3000	1	39	45	160	440	960	1320	2280	2140
3	32	3000	1	39	42	170	540	990	1460	2610	2250
3	33	3000	1	39	47	150	420	910	1740	2140	2480
3	34	3000	1	39	46	190	410	1080	1520	1960	2870
3	35	3000	1	39	44	130	480	900	1340	2380	2690
3	36	3000	1	39	52	200	530	940	1450	2170	2380
3	37	3000	1	39	50	180	470	1040	1480	2120	2410
3	38	3000	1	39	48	170	490	940	1650	1860	2850
3	39	3000	1	39	51	150	420	980	1420	2590	2080
3	40	3000	1	39	42	190	510	910	1150	2040	2960
3	41	3000	1	39	54	140	480	950	1620	2370	2380
3	42	3000	1	39	42	160	440	870	1320	2240	2410
3	43	3000	1	39	44	180	490	1010	1070	2500	2360
3	44	3000	1	39	45	190	590	990	1300	2280	2860
3	45	3000	1	39	44	200	530	940	1410	2530	2170
3	46	3000	1	39	43	170	470	980	1200	2490	2850
3	47	3000	1	39	52	140	480	1020	1210	2360	2230
3	48	3000	1	39	50	150	510	970	1620	2170	2170
3	49	3000	1	39	51	180	440	910	1520	2080	2560
3	50	3000	1	39	42	160	510	950	1340	2680	2970
3	51	3000	1	39	48	170	530	980	1980	2220	2470
3	52	3000	1	39	45	190	520	870	1580	2120	2680
3	53	3000	1	39	43	200	570	1040	1400	2200	2590
3	54	3000	1	39	41	180	590	940	1650	1740	2150
3	55	3000	1	39	45	210	460	910	1750	2040	2360
3	56	3000	1	39	42	170	490	1030	1650	1980	2750
3	57	3000	1	39	44	150	440	990	1420	2430	1980
3	58	3000	1	39	47	130	480	910	1740	2160	2840
3	59	3000	1	39	45	160	460	1020	1850	2120	2140
3	60	3000	1	39	42	170	520	930	1650	2200	2350
3	61	3000	1	39	43	140	560	970	1480	2450	2780
3	62	3000	1	39	42	180	480	950	1350	2080	2680
3	63	3000	1	39	40	160	590	1080	1620	2300	2150
3	64	3000	1	39	41	180	480	990	1420	1850	2990
3	65	3000	1	39	42	130	470	940	1580	2190	2450
3	66	3000	1	39	44	150	440	1010	1360	2360	2760
3	67	3000	1	39	42	190	530	940	1470	1980	2240
3	68	3000	1	39	45	170	420	1050	1670	2290	2310
3	69	3000	1	39	43	180	480	940	1720	2240	2450
3	70	3000	1	39	44	140	560	870	1620	2190	2860
3	71	3000	1	39	46	180	540	990	1520	2580	2760
3	72	3000	1	39	50	150	420	1040	1480	2340	2450
3	73	3000	1	39	51	190	480	940	1640	1570	2690
3	74	3000	1	39	42	210	510	1060	1670	1960	2150
3	75	3000	1	39	42	170	490	960	1420	2250	2860
3	76	3000	2	39	45	180	520	1050	1740	2070	2180
3	77	3000	2	39	43	150	490	960	1300	2360	2820
3	78	3000	2	39	45	190	560	970	1090	2470	2420
3	79	3000	2	39	44	180	630	1100	1400	2190	2480
3	80	3000	2	39	46	170	570	870	1070	2590	2260
3	81	3000	2	39	42	210	540	950	1780	2290	2560
3	82	3000	2	39	40	190	500	940	1540	2170	2500
3	83	3000	2	39	41	150	490	1060	1400	1900	2070
3	84	3000	2	39	42	180	610	860	1540	2170	2040
3	85	3000	2	39	43	190	550	940	1620	2350	2360
3	86	3000	2	39	45	170	450	970	1980	2170	2720
3	87	3000	2	39	44	210	640	1100	1520	2270	2040
3	88	3000	2	39	45	190	390	950	1900	2340	2060
3	89	3000	2	39	42	200	480	910	1760	1780	2920
3	90	3000	2	39	46	180	570	1080	1480	2110	2860
3	91	3000	2	39	42	220	510	940	1760	2170	2140
3	92	3000	2	39	41	170	550	860	1840	2250	2240
3	93	3000	2	39	42	160	600	920	1760	2390	2420
3	94	3000	2	39	42	180	380	1200	1620	2090	2440
3	95	3000	2	39	40	190	540	940	1480	2180	2260
3	96	3000	2	39	45	150	580	1010	1400	2100	2700
3	97	3000	2	39	42	200	560	980	1380	2140	2680
3	98	3000	2	39	45	180	510	920	1760	1920	1800
3	99	3000	2	39	43	190	660	890	1540	2180	2460
3	100	3000	2	39	42	150	480	1010	1700	1850	2980
3	101	3000	2	39	45	210	490	940	1410	2360	2140
3	102	3000	2	39	40	170	470	860	1650	2170	2680
3	103	3000	2	39	44	200	480	1080	1350	2070	2150
3	104	3000	2	39	45	180	570	940	1240	1960	2350
3	105	3000	2	39	42	190	490	970	1720	2370	2250
3	106	3000	2	39	46	170	510	950	1540	2120	2470
3	107	3000	2	39	42	160	570	1110	1480	2140	2980
3	108	3000	2	39	43	190	460	940	1660	2250	2680
3	109	3000	2	39	41	130	390	980	1450	2250	2150
3	110	3000	2	39	45	180	480	950	1680	2150	2850
3	111	3000	2	39	42	160	450	1200	1640	1960	2350
3	112	3000	2	39	45	170	480	990	1480	2340	2830
3	113	3000	2	39	44	150	470	950	1360	2340	2140
3	114	3000	2	39	43	190	450	1080	1480	1960	2850
3	115	3000	2	39	47	210	440	940	1650	2070	2250
3	116	3000	2	39	42	220	570	870	1420	2080	2040
3	117	3000	2	39	48	180	510	950	1360	2150	2090
3	118	3000	2	39	49	190	560	990	1800	2350	2580
3	119	3000	2	39	42	160	480	860	1640	2480	2960
3	120	3000	2	39	44	170	510	940	1370	1980	2450
3	121	3000	2	39	48	150	660	1050	1580	2300	2840
3	122	3000	2	39	45	180	570	940	1390	2140	2140
3	123	3000	2	39	45	190	540	1100	1720	2070	2680
3	124	3000	2	39	45	170	480	950	1480	2150	2020
3	125	3000	2	39	47	160	510	870	1360	2180	2170
3	126	3000	2	39	47	220	490	940	1400	2360	2250
3	127	3000	2	39	50	180	530	850	1350	1950	2860
3	128	3000	2	39	45	210	570	910	1600	2240	2470
3	129	3000	2	39	42	170	450	1080	1540	2040	2180
3	130	3000	2	39	50	230	480	950	1480	2360	2810
3	131	3000	2	39	51	190	520	970	1650	2240	2070
3	132	3000	2	39	42	170	430	920	1280	1980	1980
3	133	3000	2	39	48	150	480	980	1750	2210	2860
3	134	3000	2	39	46	190	460	1200	1620	2080	2410
3	135	3000	2	39	45	160	480	940	1580	2140	2230
3	136	3000	2	39	42	180	410	980	1600	2290	2670
3	137	3000	2	39	45	140	560	910	1700	2070	2910
3	138	3000	2	39	49	180	510	860	1290	2350	2210
3	139	3000	2	39	43	160	470	990	1510	2080	2640
3	140	3000	2	39	47	170	490	1100	1360	2260	2110
3	141	3000	2	39	50	210	540	970	1470	2110	2210
3	142	3000	2	39	51	200	460	950	1360	2310	2800
3	143	3000	2	39	45	180	420	1080	1850	1980	2470
3	144	3000	2	39	46	220	520	940	1350	2440	2190
3	145	3000	2	39	45	190	480	1090	1450	1980	2820
3	146	3000	2	39	52	180	460	990	1650	2350	2040
3	147	3000	2	39	45	150	490	1090	1300	2040	2130
3	148	3000	2	39	52	170	530	970	1210	2160	2910
3	149	3000	2	39	42	180	570	1020	1350	2450	2480
3	150	3000	2	39	46	160	540	940	1640	2340	2650
3	151	3000	3	39	48	200	320	1200	1360	2280	2380
3	152	3000	3	39	50	180	440	970	1820	2350	2480
3	153	3000	3	39	47	160	510	1040	1340	2100	2040
3	154	3000	3	39	45	180	680	970	1740	1870	2360
3	155	3000	3	39	52	190	540	920	1740	2150	2760
3	156	3000	3	39	43	190	550	940	2000	2340	2180
3	157	3000	3	39	46	200	410	1080	2060	2020	2080
3	158	3000	3	39	42	210	480	950	1740	1980	3000
3	159	3000	3	39	48	170	590	1200	1540	2210	2520
3	160	3000	3	39	45	180	530	970	1680	2240	2740
3	161	3000	3	39	41	160	430	1090	1720	2140	2220
3	162	3000	3	39	50	180	570	940	1720	2170	2900
3	163	3000	3	39	42	190	530	830	1480	2220	2300
3	164	3000	3	39	45	170	570	970	1620	2140	2000
3	165	3000	3	39	42	180	540	940	1520	2250	2820
3	166	3000	3	39	48	190	440	1070	1300	2090	2420
3	167	3000	3	39	42	150	580	940	1420	1980	2440
3	168	3000	3	39	46	210	560	1080	1400	2050	2580
3	169	3000	3	39	42	180	520	970	1440	1940	2360
3	170	3000	3	39	48	190	410	960	1680	2230	2940
3	171	3000	3	39	45	200	520	970	1380	2170	2120
3	172	3000	3	39	45	170	540	1080	1440	2340	2400
3	173	3000	3	39	47	230	500	940	1420	2440	2680
3	174	3000	3	39	41	180	400	1200	1840	2150	3220
3	175	3000	3	39	42	190	430	950	1180	2080	1920
3	176	3000	3	39	43	210	510	970	1650	2160	2680
3	177	3000	3	39	45	170	540	930	1780	1980	2150
3	178	3000	3	39	48	180	670	940	1480	2130	2860
3	179	3000	3	39	42	180	520	810	1980	2080	2320
3	180	3000	3	39	39	160	510	940	1520	2180	2140
3	181	3000	3	39	42	170	480	1080	1740	2210	2860
3	182	3000	3	39	39	160	440	970	1650	2110	2140
3	183	3000	3	39	46	170	490	840	1900	2480	2200
3	184	3000	3	39	46	150	510	880	1560	2150	2850
3	185	3000	3	39	52	190	530	1100	1370	2360	2690
3	186	3000	3	39	41	210	570	940	1480	2090	2470
3	187	3000	3	39	43	180	490	860	1520	2150	2150
3	188	3000	3	39	47	220	480	940	1920	2170	2620
3	189	3000	3	39	42	190	590	1200	1780	2140	2140
3	190	3000	3	39	46	200	480	990	1980	2340	2310
3	191	3000	3	39	39	170	410	1090	1620	2180	2850
3	192	3000	3	39	38	160	470	870	1750	2450	2100
3	193	3000	3	39	52	200	490	950	1680	2080	2760
3	194	3000	3	39	42	180	520	970	1480	2180	2040
3	195	3000	3	39	43	150	510	1080	1680	2240	1980
3	196	3000	3	39	48	190	480	880	1680	2110	2590
3	197	3000	3	39	43	160	460	940	1780	1980	2760
3	198	3000	3	39	52	180	490	1230	1690	2150	2140
3	199	3000	3	39	41	140	530	890	1580	2090	2020
3	200	3000	3	39	47	190	570	970	1640	2340	2830
3	201	3000	3	39	42	130	440	950	1780	2290	2960
3	202	3000	3	39	46	180	490	940	1980	1970	2170
3	203	3000	3	39	52	170	480	1080	1450	2150	2580
3	204	3000	3	39	53	150	530	930	1680	2350	2300
3	205	3000	3	39	52	190	480	940	1370	2140	2680
3	206	3000	3	39	50	150	460	1080	1580	2230	2750
3	207	3000	3	39	47	190	510	980	1570	2480	2120
3	208	3000	3	39	45	160	450	1240	1950	2190	2300
3	209	3000	3	39	42	180	510	950	1780	1980	2830
3	210	3000	3	39	48	170	590	970	1590	2340	2250
3	211	3000	3	39	42	190	480	1210	1370	2480	2130
3	212	3000	3	39	48	150	530	910	1270	2150	2830
3	213	3000	3	39	42	180	470	1050	1480	2090	2530
3	214	3000	3	39	46	210	480	940	1680	2110	2040
3	215	3000	3	39	42	180	550	870	1790	2150	2920
3	216	3000	3	39	48	220	450	970	1570	2070	1980
3	217	3000	3	39	42	180	490	1200	1480	1980	2130
3	218	3000	3	39	41	200	410	990	1960	2170	2280
3	219	3000	3	39	46	170	480	1200	1570	2080	2130
3	220	3000	3	39	52	150	510	970	1820	2170	2460
3	221	3000	3	39	50	190	480	890	1680	2340	2850
3	222	3000	3	39	45	130	530	900	1420	2150	2900
3	223	3000	3	39	43	180	480	860	1340	2070	2200
3	224	3000	3	39	52	160	510	990	1250	2350	2760
3	225	3000	3	39	46	170	570	950	1340	2180	2300
3	226	3000	4	39	52	180	530	970	1650	2210	2180
3	227	3000	4	39	42	190	460	1090	1420	1970	2380
3	228	3000	4	39	47	170	560	950	1600	2150	2900
3	229	3000	4	39	40	200	550	970	1760	2010	2840
3	230	3000	4	39	41	180	590	910	1600	2250	2360
3	231	3000	4	39	46	190	380	870	1440	2350	2520
3	232	3000	4	39	43	160	510	950	1220	2400	2240
3	233	3000	4	39	42	180	570	970	2100	2190	2900
3	234	3000	4	39	50	170	450	840	1500	2370	3000
3	235	3000	4	39	51	150	570	1080	1600	2080	2780
3	236	3000	4	39	48	210	450	960	1680	2030	2340
3	237	3000	4	39	49	180	570	820	1800	2050	2680
3	238	3000	4	39	52	170	430	970	1280	2340	2900
3	239	3000	4	39	47	160	550	1090	1440	2120	2680
3	240	3000	4	39	45	180	480	980	1360	2010	2560
3	241	3000	4	39	46	150	500	870	1660	2110	3000
3	242	3000	4	39	42	190	580	950	1760	2130	2140
3	243	3000	4	39	43	140	400	860	1480	2240	2920
3	244	3000	4	39	48	180	590	970	1600	2140	2500
3	245	3000	4	39	45	130	500	1080	1620	2230	2760
3	246	3000	4	39	42	200	520	950	1660	2200	2960
3	247	3000	4	39	41	180	470	900	1480	2360	2080
3	248	3000	4	39	43	170	360	980	1380	2310	2480
3	249	3000	4	39	46	160	490	1080	1320	2270	2980
3	250	3000	4	39	42	180	330	940	1720	1980	2680
3	251	3000	4	39	45	210	450	1200	1270	2090	2520
3	252	3000	4	39	42	180	540	970	1850	2240	2950
3	253	3000	4	39	40	190	530	1080	1460	2340	2460
3	254	3000	4	39	41	210	520	940	1570	2350	2380
3	255	3000	4	39	42	180	460	960	1350	2170	2860
3	256	3000	4	39	43	170	320	940	1890	2580	2930
3	257	3000	4	39	45	210	480	820	1670	2010	2410
3	258	3000	4	39	44	190	510	970	1540	2350	2860
3	259	3000	4	39	45	220	490	1060	1820	1980	2380
3	260	3000	4	39	42	180	430	890	1600	2220	2740
3	261	3000	4	39	49	150	590	910	1900	2100	2150
3	262	3000	4	39	45	130	510	940	1470	2470	2360
3	263	3000	4	39	41	180	480	870	1650	2350	2850
3	264	3000	4	39	43	170	460	940	1820	2410	2450
3	265	3000	4	39	52	160	430	1080	1650	2110	2690
3	266	3000	4	39	54	180	510	980	1720	2470	2780
3	267	3000	4	39	45	160	580	960	1360	2110	2430
3	268	3000	4	39	41	180	440	940	1940	2140	2860
3	269	3000	4	39	42	150	490	870	1850	2350	2180
3	270	3000	4	39	43	160	510	930	1950	2310	2520
3	271	3000	4	39	45	170	570	1080	1480	2150	2260
3	272	3000	4	39	41	130	480	950	1320	2340	2700
3	273	3000	4	39	42	180	460	1200	1580	1920	2560
3	274	3000	4	39	46	170	500	970	1370	2110	2960
3	275	3000	4	39	41	190	490	860	1650	2370	2340
3	276	3000	4	39	42	150	420	940	1480	2150	2860
3	277	3000	4	39	48	160	470	970	1650	1970	2700
3	278	3000	4	39	45	170	450	1080	1460	2140	2640
3	279	3000	4	39	42	180	520	940	1350	2280	2830
3	280	3000	4	39	46	140	480	970	1950	2080	2450
3	281	3000	4	39	42	180	530	1080	1480	2140	2360
3	282	3000	4	39	41	170	460	960	1520	2350	2480
3	283	3000	4	39	42	190	510	970	1620	2210	2590
3	284	3000	4	39	39	210	490	1090	1450	2150	2150
3	285	3000	4	39	38	180	540	970	1820	1980	2350
3	286	3000	4	39	45	160	440	910	1630	2240	2250
3	287	3000	4	39	42	150	420	940	1340	2140	2830
3	288	3000	4	39	41	180	480	1080	1280	1970	2420
3	289	3000	4	39	43	130	480	970	1650	2350	2710
3	290	3000	4	39	46	180	440	1070	1720	2240	2360
3	291	3000	4	39	39	170	480	970	1620	2110	2680
3	292	3000	4	39	52	180	510	950	1710	2150	2250
3	293	3000	4	39	48	150	480	940	1850	2130	2480
3	294	3000	4	39	47	160	460	1010	1920	2040	2250
3	295	3000	4	39	41	180	510	970	1300	2350	2160
3	296	3000	4	39	43	170	560	1070	1520	1960	2690
3	297	3000	4	39	44	180	480	1090	1240	2170	2830
3	298	3000	4	39	42	190	510	940	1850	2090	2450
3	299	3000	4	39	45	160	480	970	1320	1980	2750
3	300	3000	4	39	44	180	440	840	1450	2340	2230
3	1	20000	3	39	42	170	440	910	1520	2014	3260
3	2	20000	3	39	43	180	440	840	1380	1980	2700
3	3	20000	3	39	52	140	410	830	1980	2240	2860
3	4	20000	3	39	46	190	460	950	1350	1790	2800
3	5	20000	3	39	45	160	530	780	1640	2150	2540
3	6	20000	3	39	45	180	510	940	1400	2090	2600
3	7	20000	3	39	41	210	420	860	1320	2470	2340
3	8	20000	3	39	48	170	400	960	1820	1970	2920
3	9	20000	3	39	49	150	480	970	1560	2350	2840
3	10	20000	3	39	42	130	540	101	1540	1960	2520
3	11	20000	3	39	50	180	600	870	1560	2150	3300
3	12	20000	3	39	51	190	380	950	1940	2280	2600
3	13	20000	3	39	42	200	550	860	1520	2240	1920
3	14	20000	3	39	48	180	620	930	1420	2320	2360
3	15	20000	3	39	46	170	430	850	1660	1780	2880
3	16	20000	3	39	52	190	640	1060	1100	1960	2320
3	17	20000	3	39	42	210	600	970	1540	2340	2200
3	18	20000	3	39	47	180	620	980	1780	2120	2380
3	19	20000	3	39	40	140	530	760	1420	1660	3100
3	20	20000	3	39	41	190	500	980	1760	1460	2220
3	21	20000	3	39	46	160	550	780	1760	2800	2340
3	22	20000	3	39	52	170	520	840	1600	1300	2640
3	23	20000	3	39	54	160	370	950	1780	1790	2920
3	24	20000	3	39	45	130	270	1030	1480	2440	2880
3	25	20000	3	39	41	170	540	940	1860	2310	2440
3	26	20000	3	39	42	180	570	860	1340	2020	3100
3	27	20000	3	39	43	150	500	820	1580	2100	3060
3	28	20000	3	39	45	190	310	910	1280	1960	2700
3	29	20000	3	39	41	170	590	920	1180	2040	2680
3	30	20000	3	39	42	210	540	970	1600	2150	2740
3	31	20000	3	39	45	180	520	840	1920	2300	2540
3	32	20000	3	39	42	130	490	1090	1680	2340	2460
3	33	20000	3	39	46	200	450	980	1480	1980	2480
3	34	20000	3	39	41	180	520	960	1480	2140	2360
3	35	20000	3	39	42	190	450	760	1700	2350	2200
3	36	20000	3	39	48	170	390	830	1580	1980	3100
3	37	20000	3	39	45	180	450	940	1560	2040	2300
3	38	20000	3	39	42	150	290	850	1520	2440	2540
3	39	20000	3	39	46	180	590	960	1540	2520	2600
3	40	20000	3	39	42	190	410	970	1760	1960	2260
3	41	20000	3	39	41	180	230	820	1740	2310	2120
3	42	20000	3	39	42	170	530	940	1420	1860	2360
3	43	20000	3	39	42	140	500	760	1400	2020	2280
3	44	20000	3	39	48	180	470	940	1980	2100	2460
3	45	20000	3	39	45	160	520	830	1900	1950	2820
3	46	20000	3	39	45	150	410	1040	1420	2090	2360
3	47	20000	3	39	45	190	620	860	1440	2140	1860
3	48	20000	3	39	50	170	700	940	1340	2300	1860
3	49	20000	3	39	42	200	580	750	1660	2150	2680
3	50	20000	3	39	42	180	480	960	1640	1860	2150
3	51	20000	3	39	42	210	620	1080	1480	2120	2820
3	52	20000	3	39	43	107	590	940	1640	2340	2640
3	53	20000	3	39	41	200	390	780	1640	2100	2140
3	54	20000	3	39	45	180	440	950	1360	1960	2250
3	55	20000	3	39	42	190	550	970	1760	2050	2380
3	56	20000	3	39	43	130	310	740	1500	2010	2460
3	57	20000	3	39	42	180	320	920	1100	1980	2530
3	58	20000	3	39	48	170	550	940	1620	2240	2100
3	59	20000	3	39	45	140	460	1080	1220	2280	2580
3	60	20000	3	39	42	120	430	960	1460	2350	2480
3	61	20000	3	39	46	180	330	910	1110	2140	2680
3	62	20000	3	39	46	190	440	850	1620	1960	2270
3	63	20000	3	39	50	210	480	940	1440	2110	2830
3	64	20000	3	39	52	170	430	760	1260	2140	2560
3	65	20000	3	39	45	140	510	950	1180	2120	2480
3	66	20000	3	39	42	180	380	930	1480	2350	2150
3	67	20000	3	39	46	190	490	840	1140	2180	2360
3	68	20000	3	39	42	150	580	920	1520	2320	2410
3	69	20000	3	39	41	170	350	890	1320	2140	2230
3	70	20000	3	39	43	190	480	880	1420	2190	2180
3	71	20000	3	39	41	150	420	950	1850	2270	2560
3	72	20000	3	39	43	160	470	940	1340	2040	2580
3	73	20000	3	39	48	210	410	790	1260	1980	2360
3	74	20000	3	39	54	170	520	1080	1280	2160	2240
3	75	20000	3	39	42	190	390	800	1750	2340	2860
3	76	20000	3	39	46	180	410	940	1430	2120	2280
3	77	20000	3	39	41	210	440	1050	1680	2140	2480
3	78	20000	3	39	45	170	530	940	1570	2350	1980
3	79	20000	3	39	42	200	490	930	1620	2470	2650
3	80	20000	3	39	46	170	410	890	1950	1980	2480
3	81	20000	3	39	46	180	640	990	1450	2120	2600
3	82	20000	3	39	42	160	450	790	1350	2350	2580
3	83	20000	3	39	41	180	390	940	1420	2140	1970
3	84	20000	3	39	42	130	450	980	1850	2250	2450
3	85	20000	3	39	48	180	530	940	1620	1780	1860
3	86	20000	3	39	44	170	480	970	1740	2170	2250
3	87	20000	3	39	45	140	410	960	1600	2460	2680
3	88	20000	3	39	46	190	490	910	1580	1980	2480
3	89	20000	3	39	44	150	380	970	1480	2380	2580
3	90	20000	3	39	42	180	420	860	1280	2070	2240
3	91	20000	3	39	43	200	490	1080	1320	2360	2750
3	92	20000	3	39	41	170	350	950	1430	2080	2250
3	93	20000	3	39	47	150	620	970	1570	2460	2680
3	94	20000	3	39	48	180	480	860	1640	2260	2180
3	95	20000	3	39	52	170	510	940	1590	2250	2250
3	96	20000	3	39	42	150	440	920	1320	2170	2680
3	97	20000	3	39	51	180	460	860	1750	2350	1980
3	98	20000	3	39	40	220	510	950	1980	2100	2040
3	99	20000	3	39	42	170	480	1060	1650	2380	2500
3	100	20000	3	39	41	180	370	940	1480	2170	2100
3	101	20000	3	39	50	190	490	970	1650	2350	2680
3	102	20000	3	39	41	140	230	1020	1720	1780	2080
3	103	20000	3	39	45	180	480	980	1650	2170	2860
3	104	20000	3	39	48	150	420	910	1900	2430	1980
3	105	20000	3	39	43	160	410	970	1450	2380	2240
3	106	20000	3	39	51	190	560	870	1320	2140	2160
3	107	20000	3	39	41	130	520	950	1480	2350	2750
3	108	20000	3	39	42	210	370	890	1650	2150	2600
3	109	20000	3	39	39	180	480	990	1480	2340	2140
3	110	20000	3	39	42	170	530	1090	1320	2140	2060
3	111	20000	3	39	45	180	480	960	1580	1980	2200
3	112	20000	3	39	42	190	480	940	1940	2170	2840
3	113	20000	3	39	47	200	510	850	1780	2200	1990
3	114	20000	3	39	46	170	450	970	1670	2160	2480
3	115	20000	3	39	44	140	470	920	1480	2360	2600
3	116	20000	3	39	52	190	410	1060	1650	2080	2870
3	117	20000	3	39	50	150	480	930	1480	2260	2140
3	118	20000	3	39	48	180	460	910	1250	2130	2360
3	119	20000	3	39	51	160	520	1080	1730	2250	2250
3	120	20000	3	39	42	180	480	950	1580	2100	2700
3	121	20000	3	39	54	170	430	970	1470	2170	2150
3	122	20000	3	39	42	140	490	940	1650	2380	2360
3	123	20000	3	39	44	180	540	960	1480	1980	1980
3	124	20000	3	39	45	200	480	910	1350	1780	2240
3	125	20000	3	39	44	180	430	1100	1480	2120	2680
3	126	20000	3	39	42	190	610	980	1350	2210	2140
3	127	20000	3	39	48	150	390	950	1780	2200	2230
3	128	20000	3	39	45	180	480	970	1540	2080	2980
3	129	20000	3	39	43	170	540	1080	1350	2300	2480
3	130	20000	3	39	41	180	480	920	1480	1850	2160
3	131	20000	3	39	45	160	460	980	1320	2190	2600
3	132	20000	3	39	42	140	470	1090	1480	2360	2750
3	133	20000	3	39	44	170	450	880	1540	1980	1890
3	134	20000	3	39	47	150	540	940	1350	2110	2690
3	135	20000	3	39	45	190	490	920	1480	2250	2180
3	136	20000	3	39	42	170	480	970	1320	2190	2580
3	137	20000	3	39	43	180	560	840	1450	2150	1990
3	138	20000	3	39	42	160	480	1050	1240	2340	2680
3	139	20000	3	39	40	180	530	960	1650	1570	2250
3	140	20000	3	39	41	170	480	920	1240	1960	2180
3	141	20000	3	39	42	140	490	950	1480	2250	2050
3	142	20000	3	39	44	190	530	780	1320	2070	2850
3	143	20000	3	39	42	180	470	1080	1580	2040	1980
3	144	20000	3	39	45	150	520	940	1600	1980	2250
3	145	20000	3	39	43	170	460	980	1450	2190	2060
3	146	20000	3	39	44	210	480	960	1320	2240	2170
3	147	20000	3	39	46	170	530	950	1540	2190	2350
3	148	20000	3	39	50	200	540	980	1650	1980	1980
3	149	20000	3	39	51	180	510	1040	1480	2180	2980
3	150	20000	3	39	42	190	490	900	1620	2090	2040
