# Supplementary material for: Effects of varying group sizes on performance, body defects, and productivity in broiler chickens
Source: Copernicus journal article supplement (doi:10.5194/aab-65-171-2022), 2022-05-05
Supplement: Supplementary file 4 [file EPEF.xlsx]

## Sheet: Sayfa1
Group size 1		SA	BW	FI	FI stand	FCR	FCR stand	Livability
GS3000	39	39.66	2561.4	3893.3	3959.1	1.58	1.51999	95.2	3893.3	389.139		404.502
GS4000	41	39.66	2654.3	4455.4	4309.78	1.59	1.67856	90	4455.4	378.829		358.842
GS6000	39	39.66	2736.4	3954.9	4021.83	1.531	1.44529	94.5	3954.9	425.876		425.876
GS20000	38.1	39.66	2661.4	3655.7	3805.38	1.844	1.772	93.5	4716	340.258		354.083
