# Supplementary material for: Effects of varying group sizes on performance, body defects, and productivity in broiler chickens
Source: Copernicus journal article supplement (doi:10.5194/aab-65-171-2022), 2022-05-05
Supplement: Supplementary file 5 [file Sìcaklìk nem hh.xlsx]

## Sheet: Sayfa2
BLOCK	DAYS	WEEK	TREATMENT	GROUP	TEMPERATURE	RELATIVEHUMIDITY	AIRSPEED	DEATHS	MORTALITY
1	1	1	6000	1	32.5	42	0	30	0.5
1	2	1	6000	1	30.9	46	0	56	0.933333
1	3	1	6000	1	29.6	54	0	14	0.233333
1	4	1	6000	1	28.8	60	0	17	0.283333
1	5	1	6000	1	28.5	64	0	8	0.133333
1	6	1	6000	1	28	66	0	7	0.116667
1	7	1	6000	1	27.4	70	0	8	0.133333
1	8	2	6000	1	26.9	72	0	4	0.0666667
1	9	2	6000	1	26.6	72	0	5	0.0833333
1	10	2	6000	1	26.3	75	0	3	0.05
1	11	2	6000	1	26.9	66	0	3	0.05
1	12	2	6000	1	27	69	0	4	0.0666667
1	13	2	6000	1	26.9	67	0	4	0.0666667
1	14	2	6000	1	26.5	62	0	2	0.0333333
1	15	3	6000	1	27	64	0	3	0.05
1	16	3	6000	1	27	67	0	3	0.05
1	17	3	6000	1	26.5	64	0	4	0.0666667
1	18	3	6000	1	26	70	0	2	0.0333333
1	19	3	6000	1	25.9	71	0	3	0.05
1	20	3	6000	1	25.8	82	0	2	0.0333333
1	21	3	6000	1	26.1	96	0.1	7	0.116667
1	22	4	6000	1	26.1	70	0.1	7	0.116667
1	23	4	6000	1	26.1	67	0.1	6	0.1
1	24	4	6000	1	26.1	71	0.1	2	0.0333333
1	25	4	6000	1	26.4	55	0.1	4	0.0666667
1	26	4	6000	1	26.2	51	0.1	3	0.05
1	27	4	6000	1	25.9	56	0.1	5	0.0833333
1	28	4	6000	1	25.8	58	0.3	4	0.0666667
1	29	5	6000	1	25.7	48	0.3	3	0.05
1	30	5	6000	1	25.7	63	0.3	5	0.0833333
1	31	5	6000	1	25.3	64	0.3	3	0.05
1	32	5	6000	1	25.3	57	0.3	3	0.05
1	33	5	6000	1	25	56	0.3	5	0.0833333
1	34	5	6000	1	24.1	72	0.5	5	0.0833333
1	35	5	6000	1	23.9	77	0.5	5	0.0833333
1	36	6	6000	1	23.6	76	0.5	9	0.15
1	37	6	6000	1	23.3	73	0.5	3	0.05
1	38	6	6000	1	23.1	74	0.5	13	0.216667
1	39	6	6000	1	22.2	78	0.5	15	0.25
1	1	1	6000	2	32.5	42	0	58	0.966667
1	2	1	6000	2	30.9	46	0	68	1.13333
1	3	1	6000	2	29.2	54	0	47	0.783333
1	4	1	6000	2	28.2	60	0	23	0.383333
1	5	1	6000	2	28	64	0	13	0.216667
1	6	1	6000	2	27.7	66	0	8	0.133333
1	7	1	6000	2	27.1	70	0	10	0.166667
1	8	2	6000	2	26.9	72	0	6	0.1
1	9	2	6000	2	26.2	72	0	7	0.116667
1	10	2	6000	2	26	75	0	5	0.0833333
1	11	2	6000	2	26.6	66	0	2	0.0333333
1	12	2	6000	2	26.8	69	0	3	0.05
1	13	2	6000	2	26.5	67	0	4	0.0666667
1	14	2	6000	2	26.2	62	0.1	3	0.05
1	15	3	6000	2	26.8	64	0.1	5	0.0833333
1	16	3	6000	2	26.7	67	0.1	3	0.05
1	17	3	6000	2	26.2	64	0.1	4	0.0666667
1	18	3	6000	2	25.8	70	0.1	3	0.05
1	19	3	6000	2	25.7	71	0.1	5	0.0833333
1	20	3	6000	2	25.5	82	0.1	6	0.1
1	21	3	6000	2	25.7	96	0.1	4	0.0666667
1	22	4	6000	2	26	70	0.2	3	0.05
1	23	4	6000	2	25.8	67	0.2	5	0.0833333
1	24	4	6000	2	25.6	71	0.2	3	0.05
1	25	4	6000	2	26.1	55	0.2	5	0.0833333
1	26	4	6000	2	25.9	51	0.2	4	0.0666667
1	27	4	6000	2	25.7	56	0.2	5	0.0833333
1	28	4	6000	2	25.5	58	0.4	3	0.05
1	29	5	6000	2	25.3	48	0.4	8	0.133333
1	30	5	6000	2	25.3	63	0.4	5	0.0833333
1	31	5	6000	2	25	64	0.4	4	0.0666667
1	32	5	6000	2	25.1	57	0.4	3	0.05
1	33	5	6000	2	24.8	56	0.4	2	0.0333333
1	34	5	6000	2	24	72	0.6	6	0.1
1	35	5	6000	2	23.5	77	0.6	6	0.1
1	36	6	6000	2	23.2	76	0.6	1	0.0166667
1	37	6	6000	2	23	73	0.6	4	0.0666667
1	38	6	6000	2	23.2	74	0.6	6	0.1
1	39	6	6000	2	22.5	78	0.6	10	0.166667
1	1	1	20000	1	34.1	55	0	98	0.49
1	2	1	20000	1	33	43	0	112	0.56
1	3	1	20000	1	31.05	45	0	33	0.165
1	4	1	20000	1	30.25	51	0	38	0.19
1	5	1	20000	1	29.65	54	0	25	0.125
1	6	1	20000	1	29.8	59	0	19	0.095
1	7	1	20000	1	28.6	63	0	19	0.095
1	8	2	20000	1	27.2	68	0	14	0.07
1	9	2	20000	1	27	74	0	11	0.055
1	10	2	20000	1	26.7	71	0	20	0.1
1	11	2	20000	1	26.5	70	0	11	0.055
1	12	2	20000	1	27.6	66	0	11	0.055
1	13	2	20000	1	27.8	68	0	12	0.06
1	14	2	20000	1	27.05	70	0	11	0.055
1	15	3	20000	1	27	73	0	9	0.045
1	16	3	20000	1	26.9	64	0	10	0.05
1	17	3	20000	1	26.85	67	0	8	0.04
1	18	3	20000	1	26.55	63	0.1	10	0.05
1	19	3	20000	1	26.35	69	0.1	7	0.035
1	20	3	20000	1	26.2	70	0.1	10	0.05
1	21	3	20000	1	25.85	68	0.25	10	0.05
1	22	4	20000	1	25.75	61	0.25	9	0.045
1	23	4	20000	1	25.65	51	0.25	10	0.05
1	24	4	20000	1	25.65	47	0.25	14	0.07
1	25	4	20000	1	26	54	0.25	11	0.055
1	26	4	20000	1	26.5	49	0.25	11	0.055
1	27	4	20000	1	26.1	49	0.25	13	0.065
1	28	4	20000	1	25.8	54	0.25	14	0.07
1	29	5	20000	1	25.65	57	0.45	16	0.08
1	30	5	20000	1	25.8	47	0.45	16	0.08
1	31	5	20000	1	25.5	62	0.45	13	0.065
1	32	5	20000	1	25	68	0.45	13	0.065
1	33	5	20000	1	24.7	67	0.65	15	0.075
1	34	5	20000	1	25.1	62	0.65	11	0.055
1	35	5	20000	1	25.2	75	0.65	12	0.06
1	36	6	20000	1	25.15	81	0.75	14	0.07
1	37	6	20000	1	24.1	81	0.75	11	0.055
1	38	6	20000	1	24.25	78	0.75	11	0.055
1	39	6	20000	1	23.9	79	0.75	30	0.15
2	1	1	4000	1	33.9	35	0	21	0.525
2	2	1	4000	1	33.7	33	0	27	0.675
2	3	1	4000	1	32.2	33	0	45	1.125
2	4	1	4000	1	32	33	0	11	0.275
2	5	1	4000	1	31.7	35	0	6	0.15
2	6	1	4000	1	31.1	53	0	8	0.2
2	7	1	4000	1	30.6	38	0	4	0.1
2	8	2	4000	1	29.9	44	0	7	0.175
2	9	2	4000	1	29	51	0	4	0.1
2	10	2	4000	1	29.4	49	0	2	0.05
2	11	2	4000	1	28.6	49	0	3	0.075
2	12	2	4000	1	28.1	50	0	4	0.1
2	13	2	4000	1	27.8	21	0	5	0.125
2	14	2	4000	1	27.4	57	0	3	0.075
2	15	3	4000	1	27.3	53	0	3	0.075
2	16	3	4000	1	27	53	0	4	0.1
2	17	3	4000	1	26.6	58	0	4	0.1
2	18	3	4000	1	26.5	70	0	3	0.075
2	19	3	4000	1	26.7	72	0	6	0.15
2	20	3	4000	1	27.1	72	0	4	0.1
2	21	3	4000	1	27.4	67	0.1	3	0.075
2	22	4	4000	1	27.4	66	0.1	3	0.075
2	23	4	4000	1	26.9	67	0.1	3	0.075
2	24	4	4000	1	27.3	70	0.1	3	0.075
2	25	4	4000	1	27.2	75	0.1	4	0.1
2	26	4	4000	1	26.9	73	0.1	3	0.075
2	27	4	4000	1	26.9	73	0.1	4	0.1
2	28	4	4000	1	26.6	67	0.3	6	0.15
2	29	5	4000	1	27.1	67	0.3	4	0.1
2	30	5	4000	1	26.9	65	0.3	5	0.125
2	31	5	4000	1	26.9	66	0.3	6	0.15
2	32	5	4000	1	26.3	72	0.3	5	0.125
2	33	5	4000	1	25.9	77	0.5	8	0.2
2	34	5	4000	1	25.8	74	0.5	7	0.175
2	35	5	4000	1	24.3	74	0.5	8	0.2
2	36	6	4000	1	22.5	71	0.5	10	0.25
2	37	6	4000	1	23.1	78	0.5	12	0.3
2	38	6	4000	1	21.5	80	0.7	13	0.325
2	39	6	4000	1	20.5	77	0.7	15	0.375
2	40	6	4000	1	19.6	79	0.7	19	0.475
2	41	6	4000	1	20	81	0.7	30	0.75
2	1	1	4000	2	33.9	35	0	18	0.45
2	2	1	4000	2	33.7	33	0	53	1.325
2	3	1	4000	2	32.2	33	0	32	0.8
2	4	1	4000	2	32	33	0	18	0.45
2	5	1	4000	2	31.7	35	0	9	0.225
2	6	1	4000	2	31.1	53	0	8	0.2
2	7	1	4000	2	30.6	38	0	5	0.125
2	8	2	4000	2	29.9	44	0	6	0.15
2	9	2	4000	2	29	51	0	2	0.05
2	10	2	4000	2	29.4	49	0	2	0.05
2	11	2	4000	2	28.6	49	0	2	0.05
2	12	2	4000	2	28.1	50	0	3	0.075
2	13	2	4000	2	27.8	21	0	2	0.05
2	14	2	4000	2	27.4	57	0	2	0.05
2	15	3	4000	2	27.3	53	0	2	0.05
2	16	3	4000	2	27	53	0.1	2	0.05
2	17	3	4000	2	26.6	58	0.1	3	0.075
2	18	3	4000	2	26.5	70	0.1	1	0.025
2	19	3	4000	2	26.7	72	0.1	4	0.1
2	20	3	4000	2	27.1	72	0.1	1	0.025
2	21	3	4000	2	27.4	67	0.1	2	0.05
2	22	4	4000	2	27.4	66	0.1	2	0.05
2	23	4	4000	2	26.9	67	0.2	6	0.15
2	24	4	4000	2	27.3	70	0.2	2	0.05
2	25	4	4000	2	27.2	75	0.2	1	0.025
2	26	4	4000	2	26.9	73	0.3	1	0.025
2	27	4	4000	2	26.9	73	0.3	2	0.05
2	28	4	4000	2	26.6	67	0.3	5	0.125
2	29	5	4000	2	27.1	67	0.3	1	0.025
2	30	5	4000	2	26.9	65	0.3	2	0.05
2	31	5	4000	2	26.9	66	0.3	6	0.15
2	32	5	4000	2	26.3	72	0.5	2	0.05
2	33	5	4000	2	25.9	77	0.5	5	0.125
2	34	5	4000	2	25.8	74	0.5	5	0.125
2	35	5	4000	2	24.3	74	0.7	3	0.075
2	36	6	4000	2	22.5	71	0.7	9	0.225
2	37	6	4000	2	23.1	78	0.7	13	0.325
2	38	6	4000	2	21.5	80	0.7	12	0.3
2	39	6	4000	2	20.5	77	0.7	11	0.275
2	40	6	4000	2	19.6	79	0.7	14	0.35
2	41	6	4000	2	20	81	0.7	34	0.85
2	1	1	4000	3	33.5	35	0	28	0.7
2	2	1	4000	3	33.2	33	0	110	2.75
2	3	1	4000	3	31.8	33	0	80	2
2	4	1	4000	3	31.6	33	0	41	1.025
2	5	1	4000	3	31.2	35	0	11	0.275
2	6	1	4000	3	30.9	53	0	9	0.225
2	7	1	4000	3	30.3	38	0	7	0.175
2	8	2	4000	3	29.5	44	0	14	0.35
2	9	2	4000	3	28.4	51	0	3	0.075
2	10	2	4000	3	28.9	49	0	4	0.1
2	11	2	4000	3	28.2	49	0	2	0.05
2	12	2	4000	3	27.5	50	0	2	0.05
2	13	2	4000	3	27.2	21	0.1	3	0.075
2	14	2	4000	3	27	57	0.1	4	0.1
2	15	3	4000	3	26.9	53	0.1	2	0.05
2	16	3	4000	3	26.4	53	0.1	3	0.075
2	17	3	4000	3	26.2	58	0.2	2	0.05
2	18	3	4000	3	26.1	70	0.2	2	0.05
2	19	3	4000	3	26.2	72	0.2	5	0.125
2	20	3	4000	3	26.8	72	0.2	4	0.1
2	21	3	4000	3	26.9	67	0.3	2	0.05
2	22	4	4000	3	27	66	0.3	4	0.1
2	23	4	4000	3	26.6	67	0.3	5	0.125
2	24	4	4000	3	26.9	70	0.3	6	0.15
2	25	4	4000	3	26.8	75	0.3	3	0.075
2	26	4	4000	3	26.2	73	0.3	2	0.05
2	27	4	4000	3	26.1	73	0.3	3	0.075
2	28	4	4000	3	26.1	67	0.3	6	0.15
2	29	5	4000	3	26.5	67	0.3	3	0.075
2	30	5	4000	3	26.4	65	0.5	10	0.25
2	31	5	4000	3	26.3	66	0.5	9	0.225
2	32	5	4000	3	25.9	72	0.5	6	0.15
2	33	5	4000	3	25.7	77	0.5	7	0.175
2	34	5	4000	3	25.3	74	0.5	10	0.25
2	35	5	4000	3	24	74	0.8	6	0.15
2	36	6	4000	3	22.2	71	0.8	14	0.35
2	37	6	4000	3	22.9	78	0.8	14	0.35
2	38	6	4000	3	21.2	80	0.8	17	0.425
2	39	6	4000	3	19.8	77	0.8	16	0.4
2	40	6	4000	3	19.4	79	0.8	22	0.55
2	41	6	4000	3	19.5	81	0.8	38	0.95
2	1	1	20000	1	32.7	29	0	80	0.4
2	2	1	20000	1	33.25	35	0	300	1.5
2	3	1	20000	1	31.65	35	0	360	1.8
2	4	1	20000	1	31.55	33	0	109	0.545
2	5	1	20000	1	31.15	34	0	73	0.365
2	6	1	20000	1	30.65	60	0	44	0.22
2	7	1	20000	1	30.3	40	0	27	0.135
2	8	2	20000	1	30.25	44	0	24	0.12
2	9	2	20000	1	29.25	58	0	15	0.075
2	10	2	20000	1	29.4	64	0	10	0.05
2	11	2	20000	1	28.7	48	0	21	0.105
2	12	2	20000	1	28.1	48	0	13	0.065
2	13	2	20000	1	27.4	54	0	12	0.06
2	14	2	20000	1	27.35	49	0.0333333	12	0.06
2	15	3	20000	1	27.1	46	0.0333333	9	0.045
2	16	3	20000	1	26.85	53	0.0666667	13	0.065
2	17	3	20000	1	26.8	52	0.0666667	9	0.045
2	18	3	20000	1	26.45	60	0.1	13	0.065
2	19	3	20000	1	26.45	67	0.1	22	0.11
2	20	3	20000	1	26.7	69	0.133333	13	0.065
2	21	3	20000	1	27.3	70	0.2	4	0.02
2	22	4	20000	1	26.55	71	0.2	12	0.06
2	23	4	20000	1	26.45	70	0.233333	12	0.06
2	24	4	20000	1	26.3	78	0.233333	11	0.055
2	25	4	20000	1	26.45	77	0.233333	5	0.025
2	26	4	20000	1	26.45	76	0.233333	11	0.055
2	27	4	20000	1	26.15	77	0.233333	22	0.11
2	28	4	20000	1	26.3	76	0.366667	21	0.105
2	29	5	20000	1	26.05	71	0.433333	12	0.06
2	30	5	20000	1	25.3	71	0.433333	18	0.09
2	31	5	20000	1	24.2	79	0.433333	26	0.13
2	32	5	20000	1	23.9	81	0.666667	28	0.14
2	33	5	20000	1	24.1	60	0.666667	24	0.12
2	34	5	20000	1	22.2	88	0.7	22	0.11
2	35	5	20000	1	22.1	86	0.7	37	0.185
2	36	6	20000	1	21.75	88	0.733333	34	0.17
2	37	6	20000	1	21.25	89	0.8	46	0.23
2	38	6	20000	1	20.7	88	0.8	44	0.22
2	39	6	20000	1	20.75	93	0.8	47	0.235
2	40	6	20000	1	20.9	85	0.833333	21	0.105
2	41	6	20000	1	18.75	87	0.833333	11	0.055
3	1	1	3000	1	33.6	65	0	9	0.3
3	2	1	3000	1	33	66	0	7	0.233333
3	3	1	3000	1	31.1	58	0	12	0.4
3	4	1	3000	1	31.8	48	0	4	0.133333
3	5	1	3000	1	31.2	45	0	10	0.333333
3	6	1	3000	1	30.8	53	0	5	0.166667
3	7	1	3000	1	29.9	38	0	6	0.2
3	8	2	3000	1	28.2	44	0	3	0.1
3	9	2	3000	1	30	51	0	3	0.1
3	10	2	3000	1	29.2	49	0	2	0.0666667
3	11	2	3000	1	29.1	49	0	2	0.0666667
3	12	2	3000	1	29	50	0	4	0.133333
3	13	2	3000	1	29	21	0	1	0.0333333
3	14	2	3000	1	27.8	57	0	3	0.1
3	15	3	3000	1	26.6	53	0	2	0.0666667
3	16	3	3000	1	27	53	0	2	0.0666667
3	17	3	3000	1	26.9	58	0	1	0.0333333
3	18	3	3000	1	26.8	70	0	2	0.0666667
3	19	3	3000	1	26.7	72	0	2	0.0666667
3	20	3	3000	1	26.5	72	0	1	0.0333333
3	21	3	3000	1	26.4	67	0.1	3	0.1
3	22	4	3000	1	26.2	66	0.1	2	0.0666667
3	23	4	3000	1	26.1	67	0.1	1	0.0333333
3	24	4	3000	1	25.5	70	0.1	2	0.0666667
3	25	4	3000	1	25.5	75	0.1	3	0.1
3	26	4	3000	1	25.3	73	0.1	1	0.0333333
3	27	4	3000	1	24.9	73	0.1	2	0.0666667
3	28	4	3000	1	24.6	67	0.3	1	0.0333333
3	29	5	3000	1	24.4	67	0.3	2	0.0666667
3	30	5	3000	1	24.3	65	0.3	1	0.0333333
3	31	5	3000	1	24.3	66	0.3	0	0
3	32	5	3000	1	25	72	0.3	1	0.0333333
3	33	5	3000	1	24.6	77	0.3	2	0.0666667
3	34	5	3000	1	24.2	74	0.5	2	0.0666667
3	35	5	3000	1	23.8	74	0.5	3	0.1
3	36	6	3000	1	24.1	71	0.5	4	0.133333
3	37	6	3000	1	24.1	78	0.5	3	0.1
3	38	6	3000	1	24.7	80	0.5	2	0.0666667
3	39	6	3000	1	22.1	77	0.5	3	0.1
3	1	1	3000	2	33.6	65	0	12	0.4
3	2	1	3000	2	33	66	0	10	0.333333
3	3	1	3000	2	31.1	58	0	17	0.566667
3	4	1	3000	2	31.8	48	0	5	0.166667
3	5	1	3000	2	31.2	45	0	11	0.366667
3	6	1	3000	2	30.8	53	0	7	0.233333
3	7	1	3000	2	29.9	38	0	5	0.166667
3	8	2	3000	2	28.2	44	0	3	0.1
3	9	2	3000	2	30	51	0	4	0.133333
3	10	2	3000	2	29.2	49	0	4	0.133333
3	11	2	3000	2	29.1	49	0	5	0.166667
3	12	2	3000	2	29	50	0	2	0.0666667
3	13	2	3000	2	29	21	0	1	0.0333333
3	14	2	3000	2	27.8	57	0	1	0.0333333
3	15	3	3000	2	26.6	53	0	1	0.0333333
3	16	3	3000	2	27	53	0	4	0.133333
3	17	3	3000	2	26.9	58	0	2	0.0666667
3	18	3	3000	2	26.8	70	0	3	0.1
3	19	3	3000	2	26.7	72	0	2	0.0666667
3	20	3	3000	2	26.5	72	0	1	0.0333333
3	21	3	3000	2	26.4	67	0.1	2	0.0666667
3	22	4	3000	2	26.2	66	0.1	0	0
3	23	4	3000	2	26.1	67	0.1	1	0.0333333
3	24	4	3000	2	25.5	70	0.1	0	0
3	25	4	3000	2	25.5	75	0.1	2	0.0666667
3	26	4	3000	2	25.3	73	0.3	1	0.0333333
3	27	4	3000	2	24.9	73	0.3	3	0.1
3	28	4	3000	2	24.6	67	0.3	1	0.0333333
3	29	5	3000	2	24.4	67	0.3	1	0.0333333
3	30	5	3000	2	24.3	65	0.3	0	0
3	31	5	3000	2	24.3	66	0.3	1	0.0333333
3	32	5	3000	2	25	72	0.3	2	0.0666667
3	33	5	3000	2	24.6	77	0.5	3	0.1
3	34	5	3000	2	24.2	74	0.5	1	0.0333333
3	35	5	3000	2	23.8	74	0.5	2	0.0666667
3	36	6	3000	2	24.1	71	0.5	3	0.1
3	37	6	3000	2	24.1	78	0.5	6	0.2
3	38	6	3000	2	24.7	80	0.5	4	0.133333
3	39	6	3000	2	22.1	77	0.5	3	0.1
3	1	1	3000	3	33.2	65	0	15	0.5
3	2	1	3000	3	33.1	66	0	8	0.266667
3	3	1	3000	3	30.8	58	0	22	0.733333
3	4	1	3000	3	31.4	48	0	8	0.266667
3	5	1	3000	3	30.9	45	0	12	0.4
3	6	1	3000	3	30.5	53	0	5	0.166667
3	7	1	3000	3	29.5	38	0	4	0.133333
3	8	2	3000	3	28.1	44	0	4	0.133333
3	9	2	3000	3	29.5	51	0	6	0.2
3	10	2	3000	3	28.9	49	0	5	0.166667
3	11	2	3000	3	28.9	49	0	3	0.1
3	12	2	3000	3	28.7	50	0	3	0.1
3	13	2	3000	3	28.6	21	0.1	2	0.0666667
3	14	2	3000	3	27.5	57	0.1	2	0.0666667
3	15	3	3000	3	26.4	53	0.1	2	0.0666667
3	16	3	3000	3	26.9	53	0.1	3	0.1
3	17	3	3000	3	26.7	58	0.1	1	0.0333333
3	18	3	3000	3	26.7	70	0.1	2	0.0666667
3	19	3	3000	3	26.5	72	0.1	3	0.1
3	20	3	3000	3	26.4	72	0.1	1	0.0333333
3	21	3	3000	3	26.3	67	0.3	2	0.0666667
3	22	4	3000	3	26	66	0.3	3	0.1
3	23	4	3000	3	25.9	67	0.3	0	0
3	24	4	3000	3	25.4	70	0.3	1	0.0333333
3	25	4	3000	3	25.4	75	0.3	1	0.0333333
3	26	4	3000	3	25.3	73	0.3	3	0.1
3	27	4	3000	3	24.8	73	0.3	2	0.0666667
3	28	4	3000	3	24.9	67	0.3	2	0.0666667
3	29	5	3000	3	24.3	67	0.5	2	0.0666667
3	30	5	3000	3	24.2	65	0.5	1	0.0333333
3	31	5	3000	3	24.2	66	0.5	2	0.0666667
3	32	5	3000	3	24.7	72	0.5	2	0.0666667
3	33	5	3000	3	24.3	77	0.7	2	0.0666667
3	34	5	3000	3	24.1	74	0.7	2	0.0666667
3	35	5	3000	3	23.5	74	0.7	3	0.1
3	36	6	3000	3	23.8	71	0.7	2	0.0666667
3	37	6	3000	3	23.9	78	0.7	1	0.0333333
3	38	6	3000	3	24.5	80	0.7	3	0.1
3	39	6	3000	3	22	77	0.7	6	0.2
3	1	1	3000	4	33.2	65	0	16	0.533333
3	2	1	3000	4	33.1	66	0	19	0.633333
3	3	1	3000	4	30.8	58	0	24	0.8
3	4	1	3000	4	31.4	48	0	5	0.166667
3	5	1	3000	4	30.9	45	0	9	0.3
3	6	1	3000	4	30.5	53	0	4	0.133333
3	7	1	3000	4	29.5	38	0	4	0.133333
3	8	2	3000	4	28.1	44	0	5	0.166667
3	9	2	3000	4	29.5	51	0	3	0.1
3	10	2	3000	4	28.9	49	0	6	0.2
3	11	2	3000	4	28.9	49	0	5	0.166667
3	12	2	3000	4	28.7	50	0	4	0.133333
3	13	2	3000	4	28.6	21	0	1	0.0333333
3	14	2	3000	4	27.5	57	0	3	0.1
3	15	3	3000	4	26.4	53	0	3	0.1
3	16	3	3000	4	26.9	53	0.1	2	0.0666667
3	17	3	3000	4	26.7	58	0.1	4	0.133333
3	18	3	3000	4	26.7	70	0.1	1	0.0333333
3	19	3	3000	4	26.5	72	0.1	0	0
3	20	3	3000	4	26.4	72	0.1	1	0.0333333
3	21	3	3000	4	26.3	67	0.1	1	0.0333333
3	22	4	3000	4	26	66	0.3	1	0.0333333
3	23	4	3000	4	25.9	67	0.3	3	0.1
3	24	4	3000	4	25.4	70	0.3	2	0.0666667
3	25	4	3000	4	25.4	75	0.3	1	0.0333333
3	26	4	3000	4	25.3	73	0.3	3	0.1
3	27	4	3000	4	24.8	73	0.3	4	0.133333
3	28	4	3000	4	24.9	67	0.3	3	0.1
3	29	5	3000	4	24.3	67	0.5	2	0.0666667
3	30	5	3000	4	24.2	65	0.5	2	0.0666667
3	31	5	3000	4	24.2	66	0.5	1	0.0333333
3	32	5	3000	4	24.7	72	0.5	2	0.0666667
3	33	5	3000	4	24.3	77	0.5	4	0.133333
3	34	5	3000	4	24.1	74	0.7	3	0.1
3	35	5	3000	4	23.5	74	0.9	1	0.0333333
3	36	6	3000	4	23.8	71	0.9	2	0.0666667
3	37	6	3000	4	23.9	78	0.9	2	0.0666667
3	38	6	3000	4	24.5	80	0.9	3	0.1
3	39	6	3000	4	22	77	0.9	5	0.166667
3	1	1	20000	1	32.15	45	0	68	0.34
3	2	1	20000	1	32.75	43	0	43	0.215
3	3	1	20000	1	32.35	51	0	59	0.295
3	4	1	20000	1	31.9	53	0	41	0.205
3	5	1	20000	1	31.45	49	0	38	0.19
3	6	1	20000	1	30.95	35	0	27	0.135
3	7	1	20000	1	30.4	33	0	22	0.11
3	8	2	20000	1	29.6	45	0	13	0.065
3	9	2	20000	1	29.3	52	0	19	0.095
3	10	2	20000	1	29.1	58	0	23	0.115
3	11	2	20000	1	28.85	49	0	17	0.085
3	12	2	20000	1	28.85	51	0.025	13	0.065
3	13	2	20000	1	28.3	57	0.025	9	0.045
3	14	2	20000	1	28.1	60	0.05	13	0.065
3	15	3	20000	1	27.55	57	0.05	9	0.045
3	16	3	20000	1	27.7	62	0.05	15	0.075
3	17	3	20000	1	27.3	65	0.075	11	0.055
3	18	3	20000	1	26.65	58	0.075	10	0.05
3	19	3	20000	1	26.4	63	0.15	10	0.05
3	20	3	20000	1	26.5	66	0.15	18	0.09
3	21	3	20000	1	26.3	70	0.15	5	0.025
3	22	4	20000	1	26.1	71	0.2	7	0.035
3	23	4	20000	1	25.9	70	0.2	19	0.095
3	24	4	20000	1	25.6	69	0.2	11	0.055
3	25	4	20000	1	25.45	73	0.25	13	0.065
3	26	4	20000	1	25.15	68	0.3	21	0.105
3	27	4	20000	1	24.85	67	0.3	24	0.12
3	28	4	20000	1	24.55	70	0.4	38	0.19
3	29	5	20000	1	24.9	71	0.4	17	0.085
3	30	5	20000	1	24.3	77	0.4	24	0.12
3	31	5	20000	1	24.15	75	0.4	22	0.11
3	32	5	20000	1	24.7	73	0.475	27	0.135
3	33	5	20000	1	24.1	75	0.5	22	0.11
3	34	5	20000	1	23.9	78	0.55	46	0.23
3	35	5	20000	1	23.55	77	0.6	81	0.405
3	36	6	20000	1	24.2	76	0.6	115	0.575
3	37	6	20000	1	23.6	78	0.6	116	0.58
3	38	6	20000	1	23.3	80	0.6	112	0.56
3	39	6	20000	1	22.7	79	0.6	137	0.685
